# Supplementary material for: Chiral binary metal–organic frameworks for asymmetric sequential reactions
Source: Royal Society of Chemistry journal article supplement (doi:10.1039/c7cc06979k), 2017-01-01
Supplement: c7cc06979k1.pdf [file c7cc06979k1.pdf]

Supporting Information for

**Chiral binary metal-organic frameworks for asymmetric sequential reactions**

Zijian Li, Yan Liu,\* Qingchun Xia, and Yong Cui\*

*School of Chemistry and Chemical Engineering and State Key Laboratory of Metal Matrix Composites, Shanghai Jiao Tong University, Shanghai 200240, China*

Email: [liuy@sjtu.edu.cn](mailto:liuy@sjtu.edu.cn), [yongcui@sjtu.edu.cn](mailto:yongcui@sjtu.edu.cn)

**Table of Content**

|                                                                                             |    |
|---------------------------------------------------------------------------------------------|----|
| 1. Materials and general procedures.....                                                    | 2  |
| 2. Synthesis .....                                                                          | 2  |
| 3. General procedure for asymmetric catalysis .....                                         | 3  |
| 4. Table S1. Crystal data and structure refinement for MOFs .....                           | 4  |
| 5. Table S2. Selected bond lengths [ $\text{\AA}$ ] and angles [ $^\circ$ ] for MOF 1 ..... | 5  |
| 6. Table S3. Selected bond lengths [ $\text{\AA}$ ] and angles [ $^\circ$ ] for MOF 2 ..... | 7  |
| 7. Figures S1~S6. Additional X-ray crystallographic structures .....                        | 10 |
| 8. Figure S7. PXRD patterns.....                                                            | 12 |
| 9. Figure S8. Solid-state CD spectra .....                                                  | 13 |
| 10. Figure S9. TGA curves .....                                                             | 13 |
| 11. Figure S10. XPS spectra .....                                                           | 14 |
| 12. Figure S11. N <sub>2</sub> sorption isotherms and BET Surface Area plots .....          | 15 |
| 13. Figure S12. Kinetic study .....                                                         | 16 |
| 14. HPLC and NMR of the catalysis result.....                                               | 17 |
| 15. Additional results for catalysis.....                                                   | 41 |
| 16. References .....                                                                        | 44 |

## 1. Materials and general procedures.

All of the chemicals are commercial available, and used without further purification. Elemental analyses of C, N and H were performed with an EA1110 CHNS-0 CE elemental analyzer. The IR (KBr pellet) spectra were recorded (400-4000  $\text{cm}^{-1}$  region) on a Nicolet Magna 750 FT-IR spectrometer. CD spectra were recorded on a J-800 spectropolarimeter (Jasco, Japan). Thermogravimetric analyses (TGA) were carried out in an air atmosphere with a heating rate of 10  $^{\circ}\text{C}/\text{min}$  on a STA449C integration thermal analyzer. Powder X-ray diffraction (PXRD) data were collected on a DMAX2500 diffractometer using Cu  $K\alpha$  radiation. The calculated PXRD patterns were produced using the SHELXTL-XPOW program and single crystal reflection data. NMR experiments were carried out on a MERCURY plus 400 spectrometer operating at resonance frequencies of 400 M Hz. ICP-OES was performed on Optima 7300DV ICP-OES (Perkin Elmer Coporation, USA). Analytical high performance liquid chromatography (HPLC) was performed on a LC-2010HAT HPLC with UV detection at 220 nm or 250nm Analytical CHIRALCEL OD-H, AD-H column from Daicel was used. The  $\text{N}_2$  adsorption isotherms were recorded at 273 K by using a micromeritics ASAP 2020 surface area and porosity analyzer. Before the adsorption measurement, the fresh crystals were subjected to Soxhlet extraction with chloroform for 12 h and were activated at room temperature under vacuum ( $< 10^{-3}$  torr) for 4 h.

**X-ray Crystallography.** Single-crystal XRD data for MOFs **1** and **2** was collected on a Bruker D8 VENTURE CMOS photon 100 diffractometer with helios mx multilayer monochromator Cu  $K\alpha$  radiation ( $\lambda = 1.54178 \text{ \AA}$ ) at 100 K. The empirical absorption correction was applied by using the SADABS program (G. M. Sheldrick, SADABS, program for empirical absorption correction of area detector data; University of Göttingen, Göttingen, Germany, 1996). The structure was solved by direct methods with SHELXS-2014 and refined with SHELXL-2014<sup>S1</sup> using *OLEX2-1.2*<sup>S2</sup>. In the compounds, the all non-H atoms were subjected to anisotropic refinement by full-matrix program. Contributions to scattering due to these highly disordered solvent molecules were removed using the *SQUEEZE* routine of *PLATON*<sup>S3</sup>; Structures were then refined again using the data generated. Crystal data and details of the data collection are given in **Table S1**, while the selected bond distances and angles are presented in **Table S2** and **S3**.

## 2. Synthesis

### 2.1 Synthesis of $\text{FeL}^1(\text{OAc})$ , $\text{VO}(\text{H}_2\text{L}^2)$ , $\text{MnL}^1\text{Cl}$

$\text{FeL}^1(\text{OAc})$  was synthesized according to the published procedure (Yang, Z.; Zhu, C.; Li, Z.; Liu, Y.; Liu, G.; Cui, Y. *Chem. Commun.*, **2014**, 50, 8775-8778).

$\text{VO}(\text{H}_2\text{L}^2)$  was synthesized according to the published procedure (Xi, W.; Liu, Y.; Xia, Q.; Li, Z.; Cui, Y. *Chem. Eur. J.*, **2015**, 21, 12581-12585).

$\text{MnL}^1\text{Cl}$  was synthesized according to the published procedure (S.-H. Cho, B. Ma, S. T. Nguyen, J. T. Hupp, T. E. Albrecht-Schmitt, *Chem. Comm.*, **2006**, 2563-2565).

### 2.2 Synthesis of **1**, **1a** and **2**

**Synthesis of 1.** A mixture of  $\text{Cd}(\text{NO}_3)_2 \cdot 6\text{H}_2\text{O}$  (21.2 mg, 0.069 mmol),  $\text{FeL}^1(\text{OAc})$  (28.1 mg, 0.04 mmol),  $\text{VO}(\text{H}_2\text{L}^2)$  (23.5 mg, 0.04 mmol), DMF (4.3 mL), MeOH (2.85 mL) in a capped vial was heated at 80 °C for 24 h. Red block-like crystals were filtered, washed with MeOH and  $\text{Et}_2\text{O}$ , and dried at room temperature. Yield, 0.022 g, 41% based on  $[\text{Cd}_2(\text{FeL}^1)_2(\text{VOL}^2)_2] \cdot (\text{DMF})_2(\text{MeOH})_3(\text{H}_2\text{O})_4$ . Anal. Calcd for MOF-1: C, 57.87; H, 6.16; N, 6.52%. Found: C, 57.73; H, 6.56; N, 6.23%. ICP measurement indicated the ratio of Cd: Fe: V is 1:1:1. IR (KBr): 3435(br), 2932(s), 2869(w), 1599(vs), 1533(w), 1466(m), 1433(w), 1386 (s), 1332(m), 1310(w), 1200(w), 1029(w), 813(w), 727(w), 642(w)  $\text{cm}^{-1}$ .

**Synthesis of 1a.** To a suspension of activated **1** (0.05 mmol) in acetonitrile (4 mL) was added an acetonitrile solution (4 mL) of  $(\text{NH}_4)_2\text{Ce}(\text{NO}_3)_6$  (0.066 g, 0.12 mmol) with stirring for 4 hours, and the resulting mixture was filtered, washed with acetonitrile (3×8 mL) and dried at 80 °C for 2 h to give compound **1a**.

**Synthesis of 2.** A mixture of  $\text{Cd}(\text{NO}_3)_2 \cdot 6\text{H}_2\text{O}$  (17.3 mg, 0.056 mmol),  $\text{MnL}^1\text{Cl}$  (27 mg, 0.04 mmol),  $\text{VO}(\text{H}_2\text{L}^2)$  (11.7 mg, 0.02 mmol), DMF (1.1 mL), EtOH (6.5 mL) in a capped vial was heated at 80 °C for 24h. Green block-like crystals were filtered, washed with MeOH and  $\text{Et}_2\text{O}$ , and dried at room temperature. Yield, 0.020 g, 45% based on  $[\text{Cd}_2(\text{MnL}^1)_2(\text{VOL}^2)] \cdot (\text{DMF})(\text{EtOH})_2(\text{H}_2\text{O})_3$ . Anal. Calcd for MOF-2: C, 55.00; H, 5.84; N, 7.37%. Found: C, 55.31; H, 5.45; N, 7.28%. ICP measurement indicated the ratio of Cd: Mn: V is 2:2:1. IR (KBr): 3437(br), 3180(w), 3016(w), 2946(s), 2868(w), 1594(vs), 1560(w), 1437(w), 1381(vs), 1313(m), 1274(w), 1229(w), 1206(w), 1178(w), 1082(w), 1062(w), 976(m), 902(w), 818(m), 784(w), 728(m), 649(m), 571(m)  $\text{cm}^{-1}$ .

### 3. General procedure for asymmetric catalysis

#### 3.1 Asymmetric one-pot sequential reaction: alkene epoxidation/epoxide aminolysis

To a suspension of **1a** (13.4 mg, 5 mol%) in dry chloroform (2 mL), alkene (0.1 mmol) and iodosylbenzene (24 mg, 0.11 mmol) were added, and the reaction was carried out at -20 °C for 48 h. After that, solvent was changed to  $\text{CH}_2\text{Cl}_2$ , aniline (0.11 mmol) was added, and then the reaction mixture reacted for 4 h at 0 °C. After that, the mixture was centrifuged at 9000 rpm for 5 min. The concentrate was analyzed by  $^1\text{H}$  NMR to give the conversion and by HPLC to give the *ee* value.

#### 3.2 Asymmetric one-pot sequential reaction: alkene epoxidation/epoxide hydrolysis

To a suspension of **2** (9.0 mg, 4 mol%) in dry  $\text{CH}_2\text{Cl}_2$  (2 mL), alkene (0.1 mmol) and 2-(*tert*-butylsulfonyl)iodosylbenzene (2 mg, 0.006 mmol) were added. The same amount of oxidant was added 18 more times at 15 min intervals. Then the reaction was carried out for further 4 h at 0 °C. After that, the solvent was changed to *tert*-butyl methyl ether with addition of  $\text{H}_2\text{O}$  (18  $\mu\text{L}$ , 1 mmol) and the solution was directly put in a Schlenk tube under  $\text{CO}_2$  atmosphere. The reaction was carried out at 0 °C for 72 h. After that, the mixture was centrifuged at 9000 rpm for 5 min, and the supernatant was concentrated under vacuum. The concentrate was analyzed by  $^1\text{H}$  NMR to calculate the conversion and by HPLC to give the *ee* value.

### 3.3 The recycled asymmetric one-pot sequential reaction: alkene epoxidation/epoxide aminolysis

To a suspension of **1a** (13.4 mg, 5 mol%) in dry chloroform (2 mL), alkene (0.1 mmol) and iodosylbenzene (24 mg, 0.11 mmol) was added, then the reaction was carried out at -20 °C for 48 h. After that, solvent was changed to CH<sub>2</sub>Cl<sub>2</sub>, aniline (0.11 mmol) was added, and then the reaction mixture reacted for 4 h at 0 °C. After that, the mixture was centrifuged at 9000 rpm for 5 min. The concentrate was analyzed by <sup>1</sup>H NMR to give the conversion and by HPLC to give the *ee* value. The precipitate was washed with CH<sub>2</sub>Cl<sub>2</sub> for three times, sonicated for 10 min, and dried for 1 hour under vacuum. Then the obtained solid can be used for the next run.

### 3.4 The recycled asymmetric one-pot sequential reaction: alkene epoxidation/epoxide hydrolysis

To a suspension of **2** (9.0 mg, 4 mol%) in dry CH<sub>2</sub>Cl<sub>2</sub> (2 mL), alkene (0.1 mmol) and 2-(tert-butylsulfonyl)iodosylbenzene (2 mg, 0.006 mmol) were added. The same amount of oxidant was added 18 more times at 15 min intervals. Then the reaction was carried out for further 4 h at 0 °C. After that, the solvent was changed to *tert*-butyl methyl ether with addition of H<sub>2</sub>O (18 μL, 1 mmol) and the solution was directly put in a Schlenk tube under CO<sub>2</sub> atmosphere. The reaction was carried out at 0 °C for 72 h. After that, the mixture was centrifuged at 9000 rpm for 5 min, and the supernatant was concentrated under vacuum. The concentrate was analyzed by <sup>1</sup>H NMR to calculate the conversion and by HPLC to give the *ee* value. Then the obtained solid can be used for the next run.

## 4. Table S1. Crystal data and structure refinement for MOFs

| Identification code         | MOF-1                                                                                                               | MOF-2                                                                                                  |
|-----------------------------|---------------------------------------------------------------------------------------------------------------------|--------------------------------------------------------------------------------------------------------|
| Empirical formula           | C <sub>136</sub> H <sub>152</sub> Cd <sub>2</sub> Fe <sub>2</sub> N <sub>12</sub> O <sub>18.48</sub> V <sub>2</sub> | C <sub>106</sub> H <sub>118</sub> Cd <sub>2</sub> Mn <sub>2</sub> N <sub>12</sub> O <sub>18.71</sub> V |
| Formula weight              | 2688.79                                                                                                             | 2245.06                                                                                                |
| Temperature                 | 109.96 K                                                                                                            | 100.01 K                                                                                               |
| Wavelength                  | 1.54178                                                                                                             | 1.54178                                                                                                |
| Crystal system, space group | Orthorhombic, <i>P</i> 222 <sub>1</sub>                                                                             | Orthorhombic, <i>P</i> 2 <sub>1</sub> 2 <sub>1</sub> 2                                                 |
| Unit cell dimensions        | a = 24.1093(6) Å    α = 90°<br>b = 34.2098(8) Å    β = 90°<br>c = 23.7848(7) Å    γ = 90°                           | a = 34.7570(10) Å    α = 90°<br>b = 17.7053(5) Å    β = 90°<br>c = 23.9558(6) Å    γ = 90°             |
| Volume                      | 19617.1(9) Å <sup>3</sup>                                                                                           | 14742.0(7) Å <sup>3</sup>                                                                              |
| Z, Calculated density       | 4, 0.910 Mg/m <sup>3</sup>                                                                                          | 4, 1.012 Mg/m <sup>3</sup>                                                                             |
| Absorption coefficient      | 3.997 mm <sup>-1</sup>                                                                                              | 4.560 mm <sup>-1</sup>                                                                                 |
| F(000)                      | 5575                                                                                                                | 4627                                                                                                   |
| Crystal size                | 0.08 × 0.06 × 0.05 mm                                                                                               | 0.06 × 0.05 × 0.03 mm                                                                                  |

|                                   |                                                   |                                                   |
|-----------------------------------|---------------------------------------------------|---------------------------------------------------|
| Theta range for data collection   | 2.242 to 50.742 deg.                              | 2.240 to 47.355 deg.                              |
| Limiting indices                  | -24<=h<=24<br>-34<=k<=34<br>-23<=l<=23            | -20<=h<=33<br>-16<=k<=16<br>-22<=l<=22            |
| Reflections collected / unique    | 72053 / 20479 [R(int) = 0.0684]                   | 53769 / 13279 [R(int) = 0.0570]                   |
| Completeness                      | 99.0 %                                            | 99.5 %                                            |
| Refinement method                 | Full-matrix least-squares on F <sup>2</sup>       | Full-matrix least-squares on F <sup>2</sup>       |
| Data / restraints / parameters    | 20479 / 2989 / 1456                               | 13279 / 2496 / 1262                               |
| Goodness-of-fit on F <sup>2</sup> | 1.021                                             | 1.045                                             |
| Final R indices [I>2sigma(I)]     | R <sub>I</sub> = 0.0786, wR <sub>2</sub> = 0.2095 | R <sub>I</sub> = 0.0639, wR <sub>2</sub> = 0.1649 |
| R indices (all data)              | R <sub>I</sub> = 0.1096, wR <sub>2</sub> = 0.2361 | R <sub>I</sub> = 0.0715, wR <sub>2</sub> = 0.1712 |
| Absolute structure parameter      | 0.157(5)                                          | 0.249(5)                                          |
| Largest diff. peak and hole       | 1.261 and -0.856 e.Å <sup>-3</sup>                | 0.891 and -0.873 e.Å <sup>-3</sup>                |

## 5. Table S2. Selected bond lengths [Å] and angles [°] for MOF 1

---

|               |           |
|---------------|-----------|
| Cd(1)-O(18)#1 | 2.248(8)  |
| Cd(1)-O(17)   | 2.292(11) |
| Cd(1)-N(3)    | 2.340(5)  |
| Cd(1)-O(12)#2 | 2.328(9)  |
| Cd(1)-O(13)#2 | 2.379(10) |
| Cd(1)-N(4)#3  | 2.287(11) |
| Cd(2)-O(11)#4 | 2.210(11) |
| Cd(2)-O(20)   | 2.347(10) |
| Cd(2)-O(19)   | 2.371(12) |
| Cd(2)-O(10)   | 2.277(13) |
| Cd(2)-N(7)    | 2.308(7)  |
| Cd(2)-N(8)#3  | 2.318(19) |
| Fe(1)-O(3)    | 1.752(4)  |
| Fe(1)-O(1)    | 1.907(12) |
| Fe(1)-O(2)    | 1.937(11) |
| Fe(1)-N(2)    | 2.086(13) |
| Fe(1)-N(1)    | 2.103(14) |
| Fe(2)-O(4)    | 1.892(12) |
| Fe(2)-O(5)    | 1.956(13) |
| Fe(2)-N(5)    | 2.045(16) |
| Fe(2)-O(6)    | 1.756(4)  |
| Fe(2)-N(6)    | 2.032(17) |
| V(2)-O(15)    | 1.897(10) |
| V(2)-N(12)    | 2.165(14) |
| V(2)-O(14)    | 1.984(11) |

|            |           |
|------------|-----------|
| V(2)-N(11) | 2.118(12) |
| V(2)-O(16) | 1.668(7)  |
| V(1)-O(9)  | 1.142(17) |
| V(1)-O(7)  | 2.22(2)   |
| V(1)-O(8)  | 2.19(2)   |
| V(1)-N(9)  | 2.15(2)   |
| V(1)-N(10) | 2.12(2)   |

|                       |          |
|-----------------------|----------|
| O(18)#1-Cd(1)-O(17)   | 129.9(4) |
| O(18)#1-Cd(1)-N(3)    | 88.7(3)  |
| O(18)#1-Cd(1)-O(12)#2 | 139.9(4) |
| O(18)#1-Cd(1)-O(13)#2 | 85.0(4)  |
| O(18)#1-Cd(1)-N(4)#3  | 92(3)    |
| O(17)-Cd(1)-N(3)      | 90.1(3)  |
| O(17)-Cd(1)-O(12)#2   | 90.2(4)  |
| O(17)-Cd(1)-O(13)#2   | 144.8(4) |
| N(3)-Cd(1)-O(13)#2    | 95.5(4)  |
| O(12)#2-Cd(1)-N(3)    | 92.5(3)  |
| O(12)#2-Cd(1)-O(13)#2 | 55.0(4)  |
| N(4)#3-Cd(1)-O(17)    | 85(4)    |
| N(4)#3-Cd(1)-N(3)     | 174(4)   |
| N(4)#3-Cd(1)-O(12)#2  | 91(3)    |
| N(4)#3-Cd(1)-O(13)#2  | 91(4)    |
| O(11)#4-Cd(2)-O(20)   | 142.3(5) |
| O(11)#4-Cd(2)-O(19)   | 88.1(4)  |
| O(11)#4-Cd(2)-O(10)   | 130.6(4) |
| O(11)#4-Cd(2)-N(7)    | 90.3(4)  |
| O(11)#4-Cd(2)-N(8)#3  | 88(4)    |
| O(20)-Cd(2)-O(19)     | 54.4(4)  |
| O(10)-Cd(2)-O(20)     | 86.9(4)  |
| O(10)-Cd(2)-O(19)     | 141.3(4) |
| O(10)-Cd(2)-N(7)      | 87.5(4)  |
| O(10)-Cd(2)-N(8)#3    | 88(4)    |
| N(7)-Cd(2)-O(20)      | 95.6(4)  |
| N(7)-Cd(2)-O(19)      | 94.3(4)  |
| N(7)-Cd(2)-N(8)#3     | 172(5)   |
| N(8)#3-Cd(2)-O(20)    | 90(4)    |
| N(8)#3-Cd(2)-O(19)    | 93(5)    |
| O(3)-Fe(1)-O(1)       | 103.7(6) |
| O(3)-Fe(1)-O(2)       | 112.3(6) |
| O(3)-Fe(1)-N(2)       | 101.2(6) |
| O(3)-Fe(1)-N(1)       | 107.2(6) |
| O(1)-Fe(1)-O(2)       | 93.1(5)  |
| O(1)-Fe(1)-N(2)       | 152.8(7) |

|                  |           |
|------------------|-----------|
| O(1)-Fe(1)-N(1)  | 85.0(6)   |
| O(2)-Fe(1)-N(2)  | 87.3(5)   |
| O(2)-Fe(1)-N(1)  | 139.7(7)  |
| N(2)-Fe(1)-N(1)  | 77.4(5)   |
| O(4)-Fe(2)-O(5)  | 95.1(6)   |
| O(4)-Fe(2)-N(5)  | 84.2(6)   |
| O(4)-Fe(2)-N(6)  | 141.1(7)  |
| O(5)-Fe(2)-N(5)  | 150.8(7)  |
| O(5)-Fe(2)-N(6)  | 85.4(6)   |
| O(6)-Fe(2)-O(4)  | 110.6(7)  |
| O(6)-Fe(2)-O(5)  | 104.0(6)  |
| O(6)-Fe(2)-N(5)  | 103.6(7)  |
| O(6)-Fe(2)-N(6)  | 107.0(7)  |
| N(6)-Fe(2)-N(5)  | 77.4(6)   |
| O(15)-V(2)-N(12) | 84.4(5)   |
| O(15)-V(2)-O(14) | 89.4(5)   |
| O(15)-V(2)-N(11) | 145.6(6)  |
| O(14)-V(2)-N(12) | 135.2(5)  |
| O(14)-V(2)-N(11) | 85.7(5)   |
| N(11)-V(2)-N(12) | 75.6(5)   |
| O(16)-V(2)-O(15) | 109.7(9)  |
| O(16)-V(2)-N(12) | 103.1(4)  |
| O(16)-V(2)-O(14) | 120.7(5)  |
| O(16)-V(2)-N(11) | 102.1(9)  |
| O(9)-V(1)-O(7)   | 123.9(11) |
| O(9)-V(1)-O(8)   | 122(3)    |
| O(9)-V(1)-N(9)   | 112(3)    |
| O(9)-V(1)-N(10)  | 110.9(12) |
| O(8)-V(1)-O(7)   | 72.9(7)   |
| N(9)-V(1)-O(7)   | 82.2(9)   |
| N(9)-V(1)-O(8)   | 125.3(12) |
| N(10)-V(1)-O(7)  | 125.1(13) |
| N(10)-V(1)-O(8)  | 82.4(8)   |
| N(10)-V(1)-N(9)  | 73.4(8)   |

---

Symmetry transformations used to generate equivalent atoms:

#1  $x, -y+1, -z+1$    #2  $x, y, z-1$    #3  $x-1, y, z$    #4  $x, -y+2, -z+2$   
#5  $-x+1, y, -z+5/2$    #6  $-x+1, y, -z+3/2$    #7  $x, y, z+1$    #8  $x+1, y, z$

### 6. Table S3. Selected bond lengths [ $\text{\AA}$ ] and angles [ $^\circ$ ] for MOF 2

---

|              |           |
|--------------|-----------|
| Cd(1)-N(3)   | 2.343(10) |
| Cd(1)-O(9)   | 2.355(10) |
| Cd(1)-N(4)#1 | 2.244(9)  |

|               |           |
|---------------|-----------|
| Cd(1)-O(12)   | 2.482(10) |
| Cd(1)-O(11)   | 2.469(11) |
| Cd(1)-O(10)#2 | 2.396(10) |
| Cd(1)-O(10)   | 2.408(9)  |
| Cd(2)-O(7)    | 2.419(8)  |
| Cd(2)-O(7)#3  | 2.369(9)  |
| Cd(2)-O(8)    | 2.367(9)  |
| Cd(2)-N(8)    | 2.238(5)  |
| Cd(2)-O(14)   | 2.479(10) |
| Cd(2)-N(7)#1  | 2.340(10) |
| Cd(2)-O(16)   | 2.490(11) |
| Mn(1)-O(2)    | 1.935(10) |
| Mn(1)-O(1)    | 1.905(10) |
| Mn(1)-N(2)    | 2.041(13) |
| Mn(1)-N(1)    | 2.026(12) |
| Mn(1)-O(17)   | 1.665(14) |
| Mn(2)-O(3)    | 1.919(11) |
| Mn(2)-O(4)    | 1.945(11) |
| Mn(2)-N(6)    | 2.086(13) |
| Mn(2)-N(5)    | 2.006(13) |
| Mn(2)-O(18)   | 1.625(16) |

|                      |          |
|----------------------|----------|
| N(3)-Cd(1)-O(9)      | 88.6(3)  |
| N(3)-Cd(1)-O(12)     | 91.3(4)  |
| N(3)-Cd(1)-O(11)     | 97.7(4)  |
| N(3)-Cd(1)-O(10)     | 93.0(3)  |
| N(3)-Cd(1)-O(10)#2   | 89.5(4)  |
| O(9)-Cd(1)-O(12)     | 133.3(4) |
| O(9)-Cd(1)-O(11)     | 82.5(3)  |
| O(9)-Cd(1)-O(10)#2   | 129.4(3) |
| O(9)-Cd(1)-O(10)     | 54.8(3)  |
| N(4)#1-Cd(1)-N(3)    | 173(3)   |
| N(4)#1-Cd(1)-O(9)    | 98(3)    |
| N(4)#1-Cd(1)-O(12)   | 83(3)    |
| N(4)#1-Cd(1)-O(11)   | 82(3)    |
| N(4)#1-Cd(1)-O(10)   | 92(3)    |
| N(4)#1-Cd(1)-O(10)#2 | 87(3)    |
| O(11)-Cd(1)-O(12)    | 51.3(4)  |
| O(10)#2-Cd(1)-O(12)  | 97.2(4)  |
| O(10)-Cd(1)-O(12)    | 170.9(4) |
| O(10)-Cd(1)-O(11)    | 135.6(3) |
| O(10)#2-Cd(1)-O(11)  | 147.6(3) |
| O(10)#2-Cd(1)-O(10)  | 74.9(3)  |
| O(7)#3-Cd(2)-O(7)    | 75.0(3)  |



|                     |          |
|---------------------|----------|
| O(7)-Cd(2)-O(14)    | 170.6(3) |
| O(7)#3-Cd(2)-O(14)  | 96.8(3)  |
| O(7)-Cd(2)-O(16)    | 135.4(3) |
| O(7)#3-Cd(2)-O(16)  | 146.8(3) |
| O(8)-Cd(2)-O(7)#3   | 129.8(3) |
| O(8)-Cd(2)-O(7)     | 55.0(3)  |
| O(8)-Cd(2)-O(14)    | 133.4(3) |
| O(8)-Cd(2)-O(16)    | 82.3(3)  |
| N(8)-Cd(2)-O(7)#3   | 88.5(3)  |
| N(8)-Cd(2)-O(7)     | 93.5(3)  |
| N(8)-Cd(2)-O(8)     | 91.4(3)  |
| N(8)-Cd(2)-O(14)    | 90.9(3)  |
| N(8)-Cd(2)-N(7)#1   | 173.1(3) |
| N(8)-Cd(2)-O(16)    | 100.2(4) |
| O(14)-Cd(2)-O(16)   | 51.6(4)  |
| N(7)#1-Cd(2)-O(7)   | 90.3(3)  |
| N(7)#1-Cd(2)-O(7)#3 | 86.9(3)  |
| N(7)#1-Cd(2)-O(8)   | 95.5(3)  |
| N(7)#1-Cd(2)-O(14)  | 84.6(4)  |
| N(7)#1-Cd(2)-O(16)  | 81.0(4)  |
| O(2)-Mn(1)-N(2)     | 87.0(5)  |
| O(2)-Mn(1)-N(1)     | 150.6(5) |
| O(1)-Mn(1)-O(2)     | 87.3(4)  |
| O(1)-Mn(1)-N(2)     | 140.7(5) |
| O(1)-Mn(1)-N(1)     | 87.0(5)  |
| N(1)-Mn(1)-N(2)     | 79.5(5)  |
| O(17)-Mn(1)-O(2)    | 103.7(5) |
| O(17)-Mn(1)-O(1)    | 109.4(6) |
| O(17)-Mn(1)-N(2)    | 109.7(6) |
| O(17)-Mn(1)-N(1)    | 105.4(6) |
| O(3)-Mn(2)-O(4)     | 88.8(5)  |
| O(3)-Mn(2)-N(6)     | 141.6(5) |
| O(3)-Mn(2)-N(5)     | 87.2(5)  |
| O(4)-Mn(2)-N(6)     | 85.9(5)  |
| O(4)-Mn(2)-N(5)     | 150.1(6) |
| N(5)-Mn(2)-N(6)     | 79.1(5)  |
| O(18)-Mn(2)-O(3)    | 105.9(6) |
| O(18)-Mn(2)-O(4)    | 104.3(6) |
| O(18)-Mn(2)-N(6)    | 112.3(7) |
| O(18)-Mn(2)-N(5)    | 105.3(7) |

---

Symmetry transformations used to generate equivalent atoms:

#1 x,y,z+1    #2 -x+1,-y+1,z    #3 -x,-y+1,z    #4 x,y,z-1

## 7. Figures S1~S6. Additional X-ray crystallographic structures

### 7.1 Figure S1. The Cd ions dimers in 1

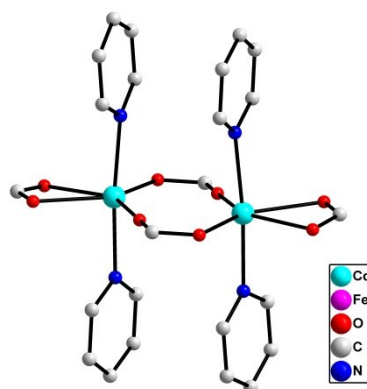

### 7.2 Figure S2. The 2D layered structure formed by Cd ions and VOL<sup>2</sup> in 1.

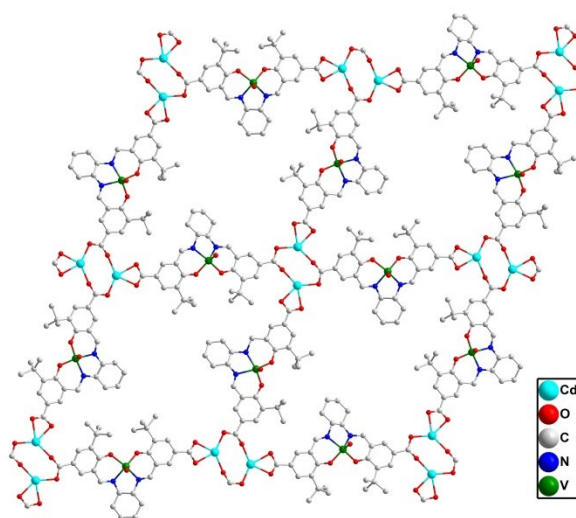

### 7.3 Figure S3. View of the 3D pillared-layer structure of 1 along the *c*-axis (Cd ions are shown in polyhedron)

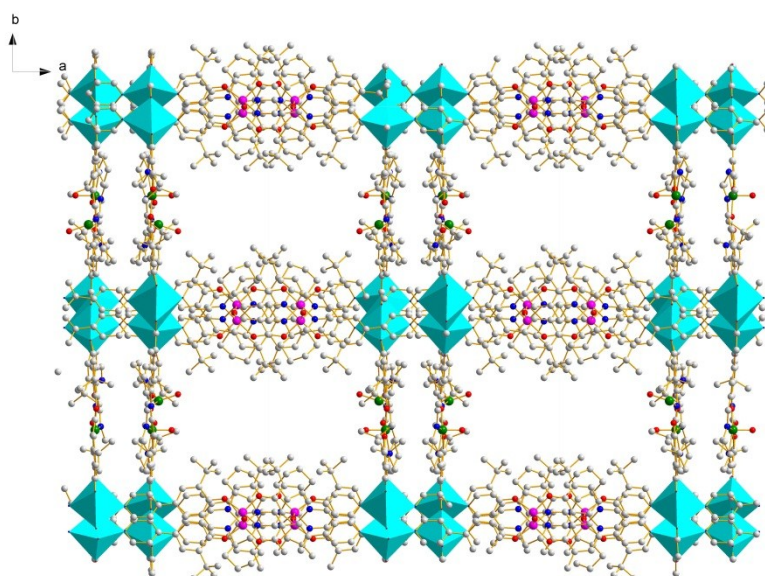

### 7.4 Figure S4. The Cd ions dimer in 2

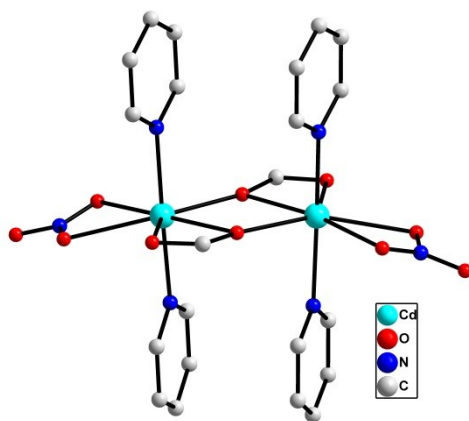

7.5 Figure S5. The 1D chain built by Cd ions and VOL<sup>2</sup> units (a), Cd ions and MnL<sup>1</sup> units (b) in **2**

(a)

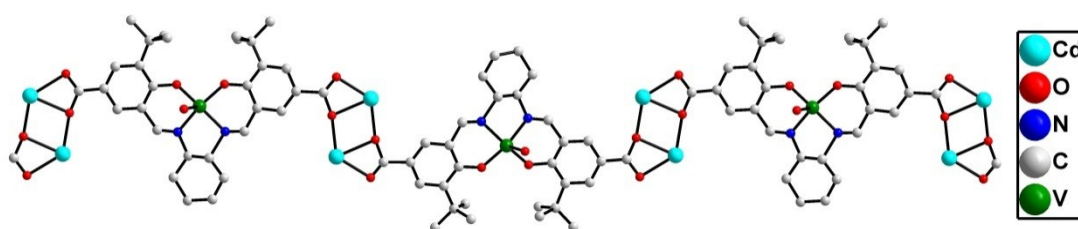

(b)

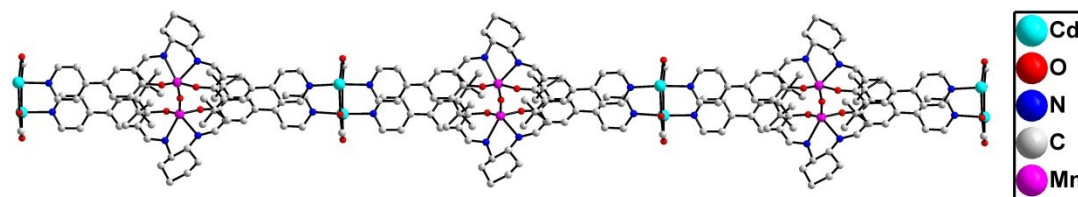

7.6 Figure S6. View of one independent chiral network of **2**

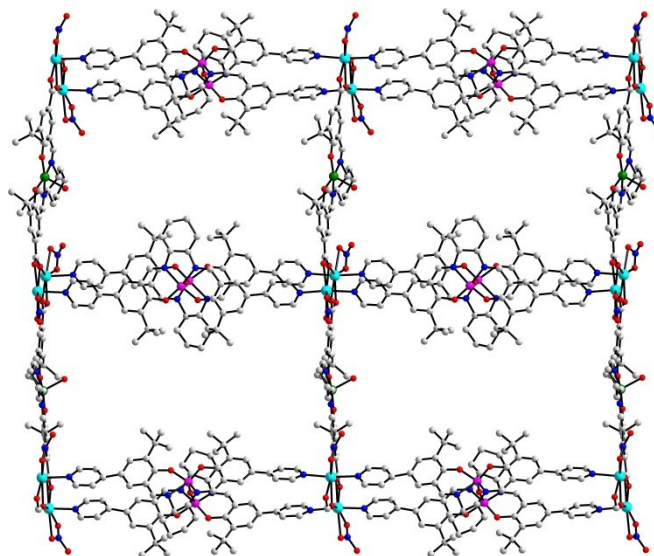

8. Figure S7. PXRD patterns

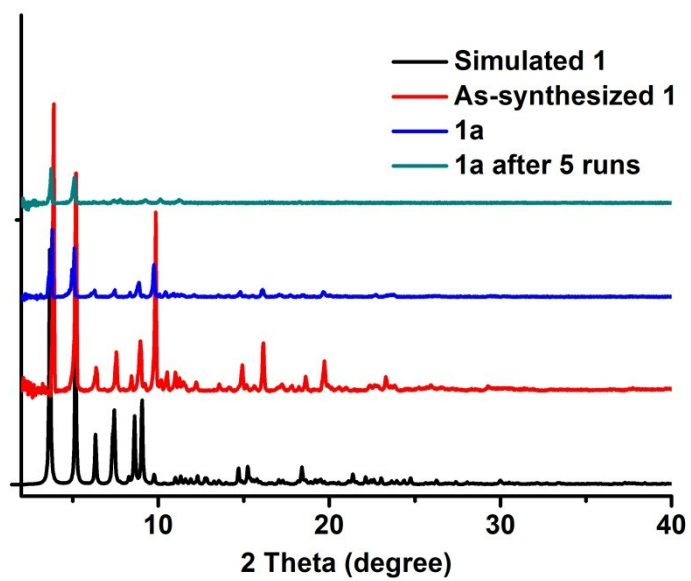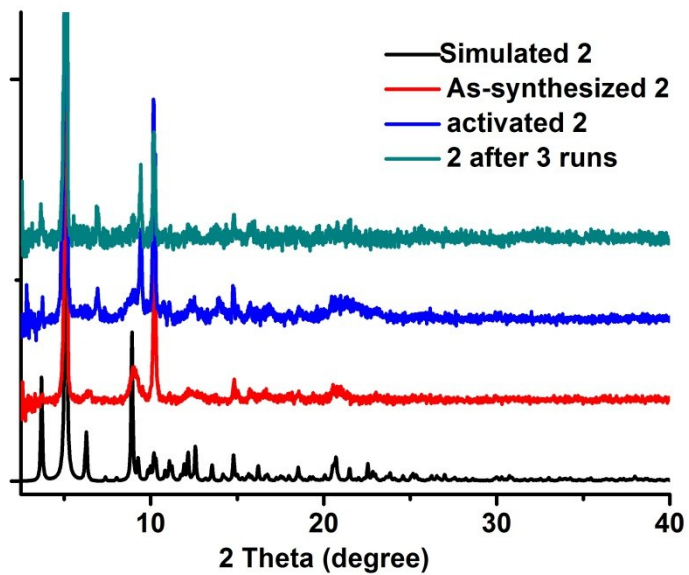

9. Figure S8. Solid-state CD spectra

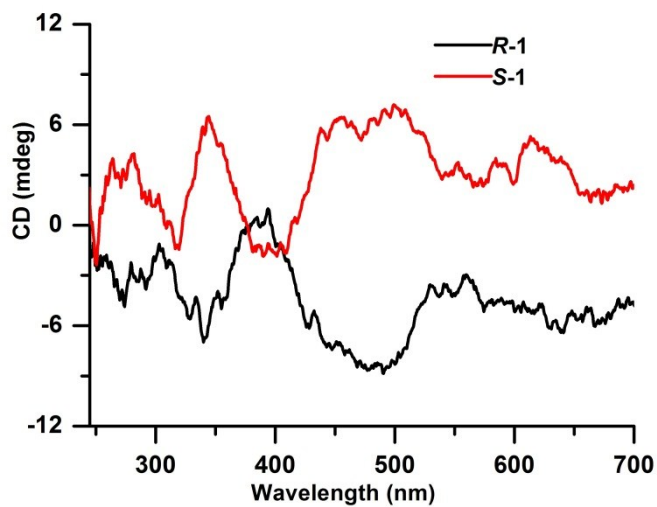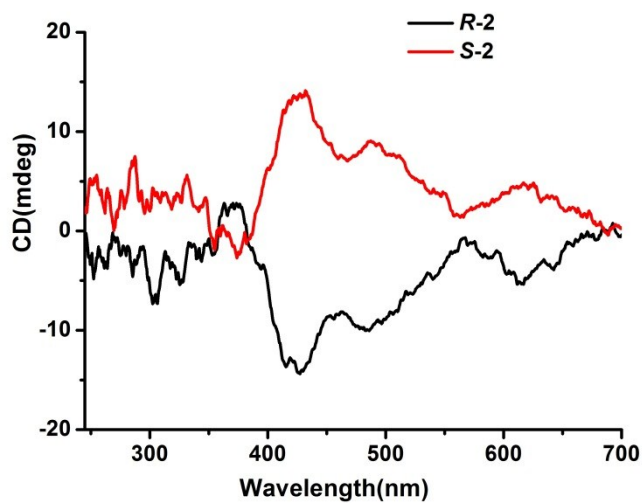

10. Figure S9. TGA curves

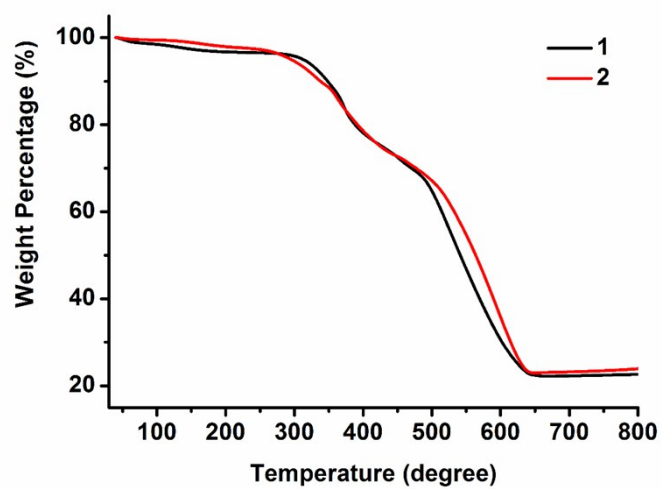

## 11. Figure S10. XPS spectra

### 11.1. XPS spectra of MOF 1 and MOF 1a

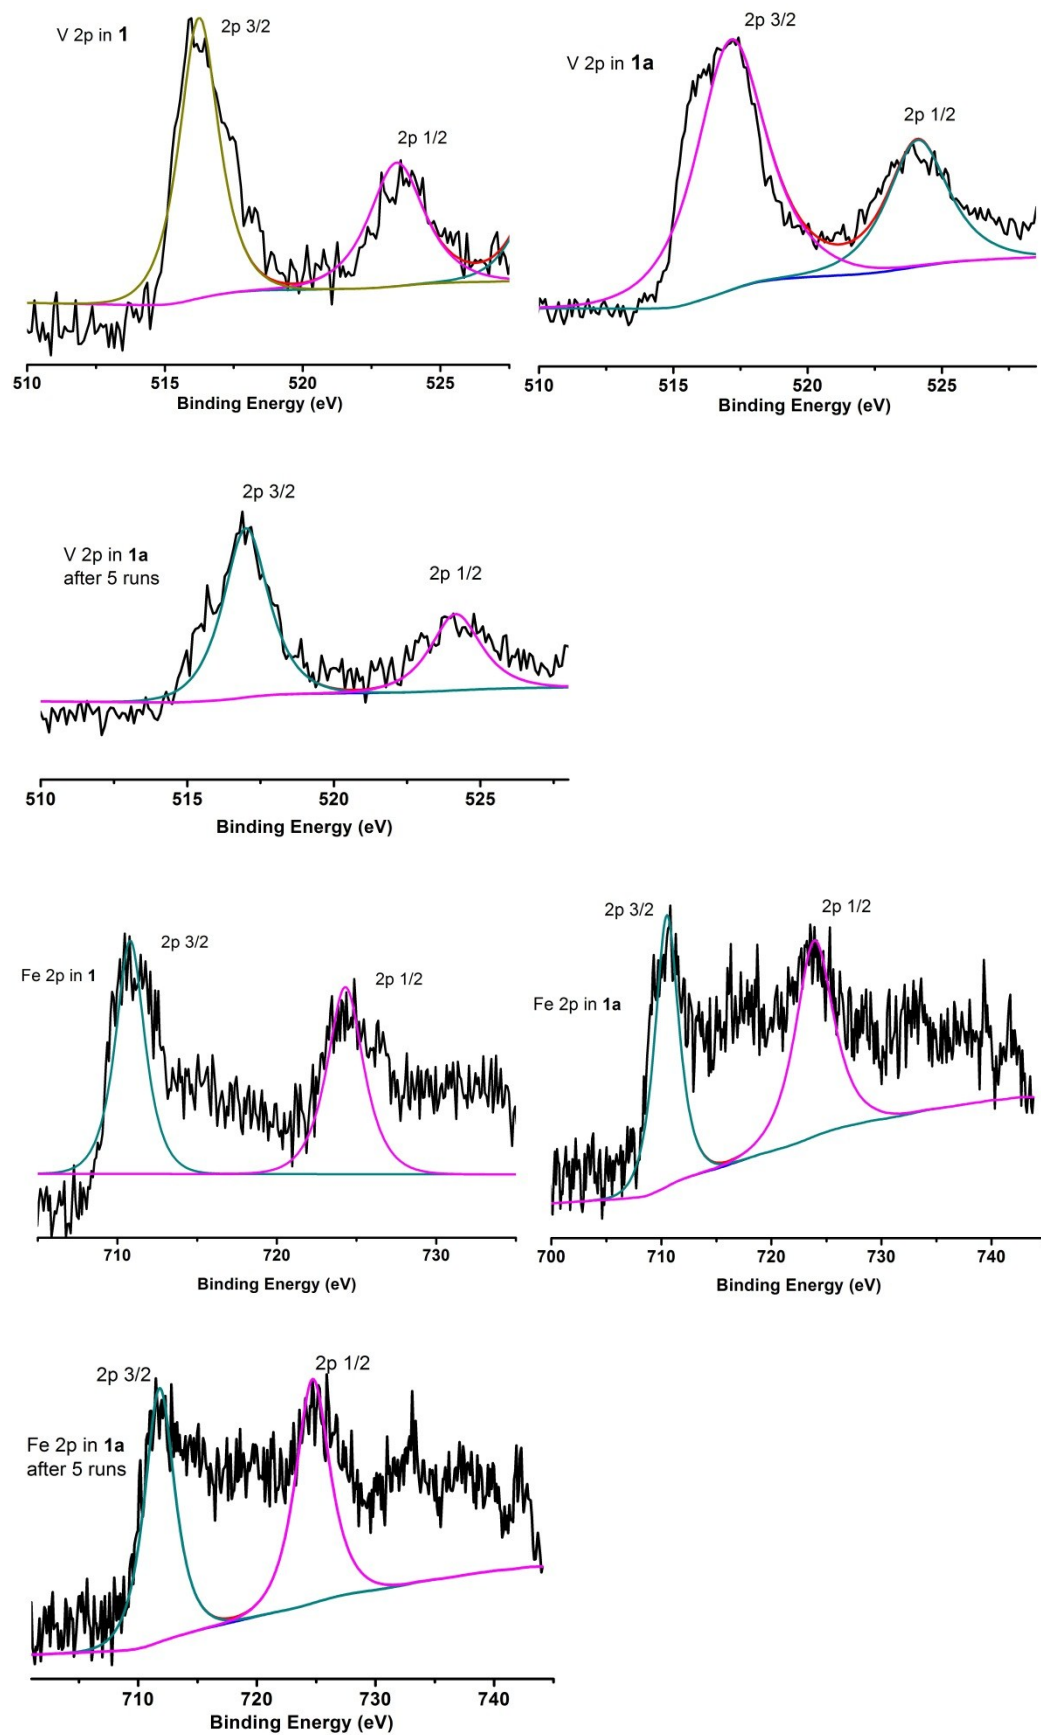

## 11.2 XPS spectra of MOF 2

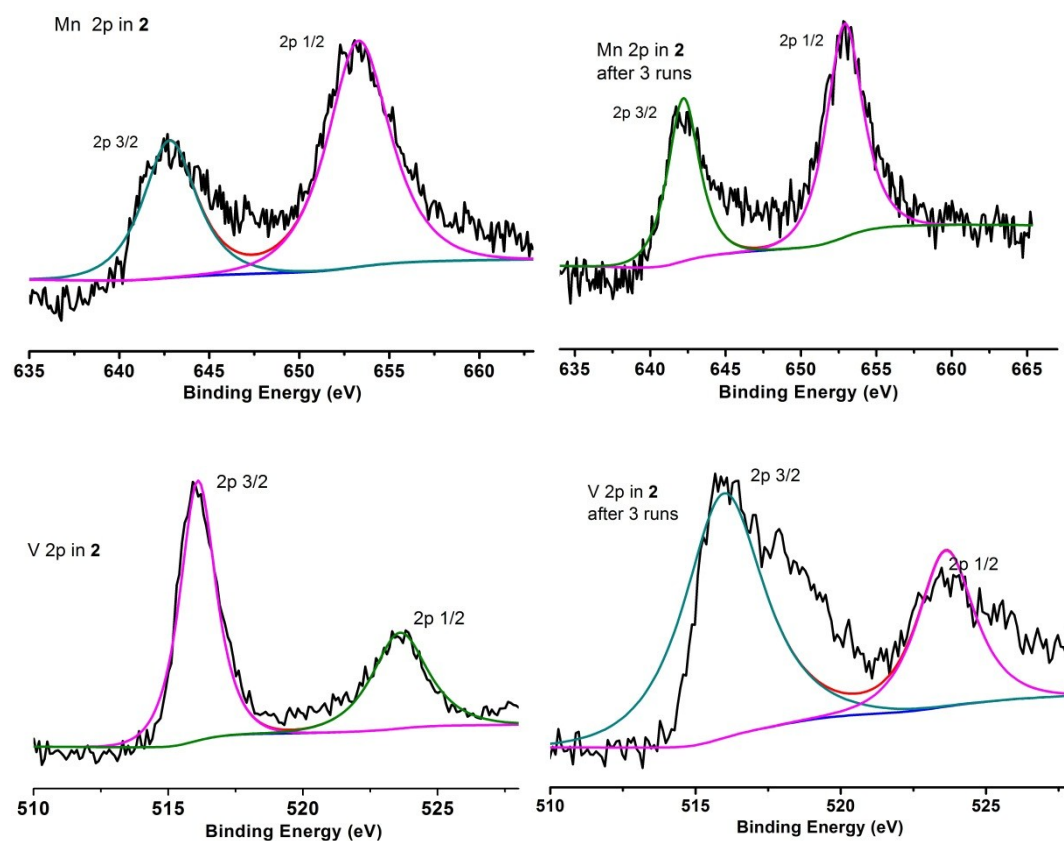

## 12. Figure S11. N<sub>2</sub> sorption isotherms and BET Surface Area plots

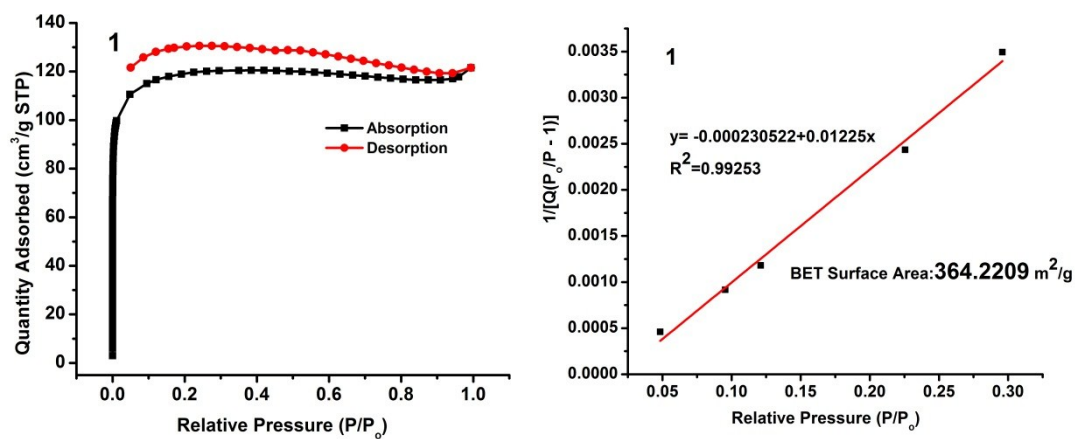

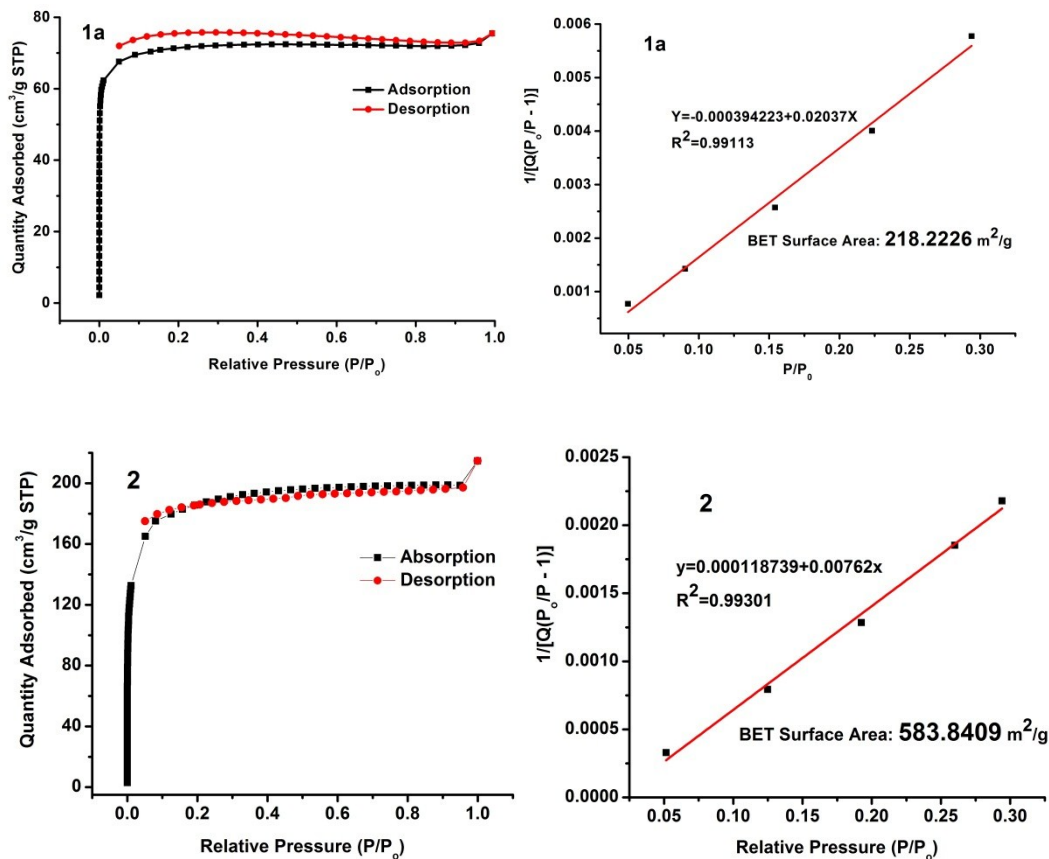

13.

13. Figure S12. Kinetic curves of MOF 1a and the homogeneous FeL<sup>1</sup>(OAc) catalyzed epoxidation reaction

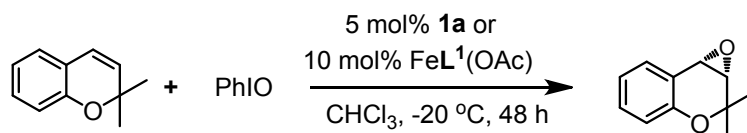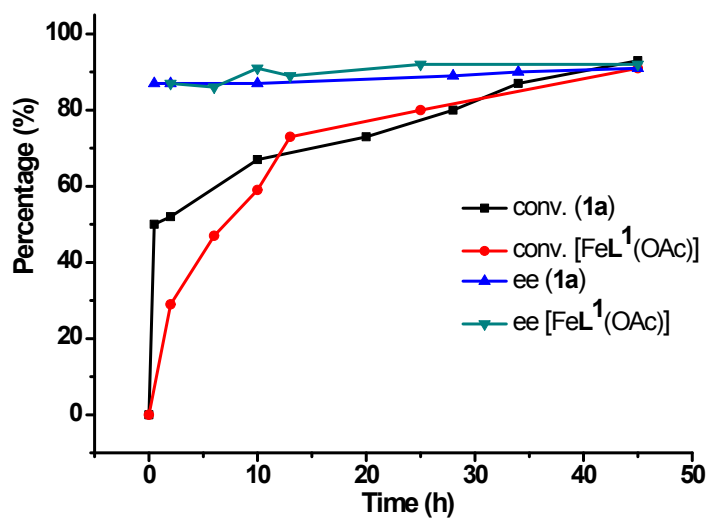



## 14. HPLC and NMR of the catalysis result<sup>4</sup>

### 14.1 Alkene epoxidation/epoxide aminolysis catalyzed by MOF 1a

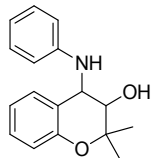

**2,2-dimethyl-4-(phenylamino)chroman-3-ol:** Enantiomeric excess was determined by HPLC with a chiralcel AD-H column (hexane/i-PrOH = 95/5, 1.0 mL/min, 250 nm),  $t_{major} = 17.69$  min,  $t_{minor} = 20.48$  min; ee=94%.

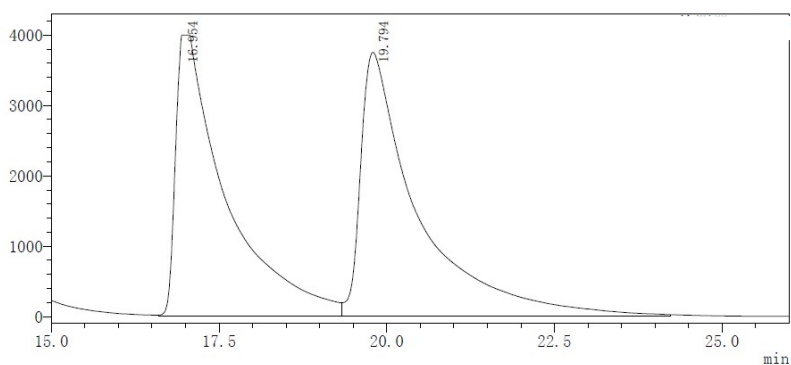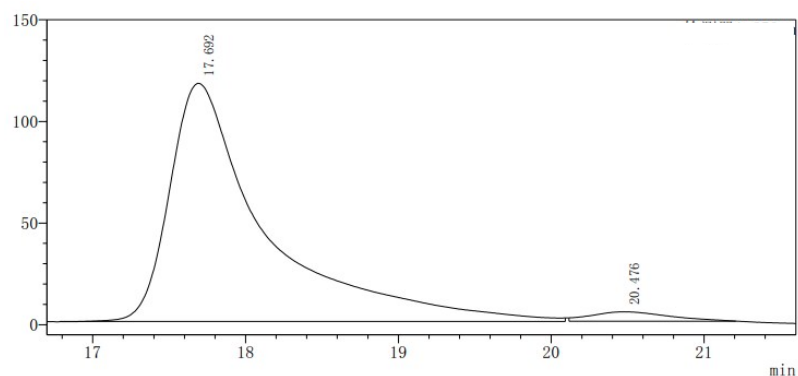

| Serial Number | Retention Time [min] | Area    | Area % |
|---------------|----------------------|---------|--------|
| 1             | 17.692               | 5126274 | 96.878 |
| 2             | 20.476               | 165179  | 3.122  |

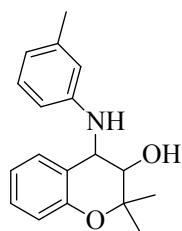

**4-(m-toluidino)-2,2-dimethylchroman-3-ol:** Enantiomeric excess was determined by HPLC with a chiralcel AD-H column (hexane/*i*-PrOH = 95/5, 1.0 mL/min, 250 nm),  $t_{major} = 13.26$  min,  $t_{minor} = 19.47$  min; ee=94%.

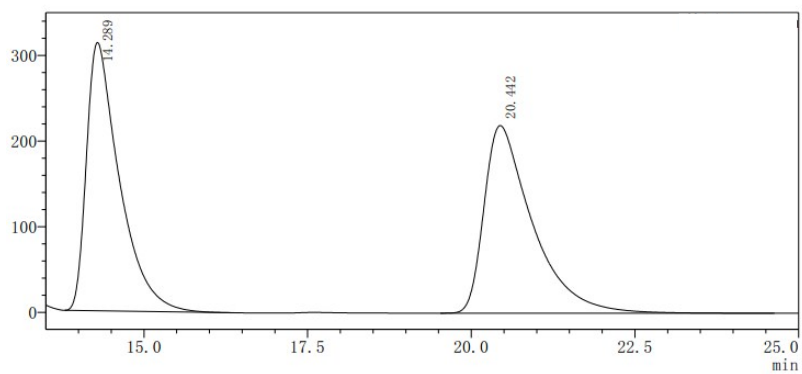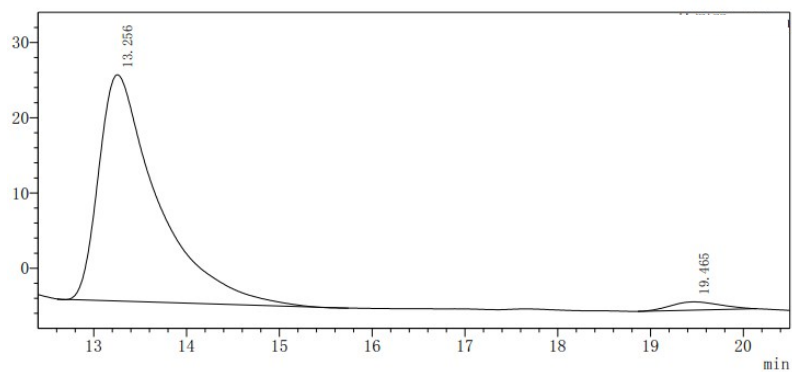

| Serial Number | Retention Time [min] | Area    | Area % |
|---------------|----------------------|---------|--------|
| 1             | 13.256               | 1325322 | 97.060 |
| 2             | 19.465               | 40149   | 2.940  |

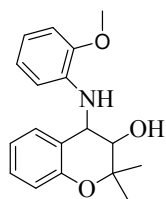

**4-(2-methoxyphenylamino)-2,2-dimethylchroman-3-ol:** Enantiomeric excess was determined by HPLC with a chiralcel AD-H column (hexane/i-PrOH = 95/5, 1.0 mL/min, 250 nm),  $t_{minor} = 11.78$  min,  $t_{major} = 13.74$  min,; ee=91%.

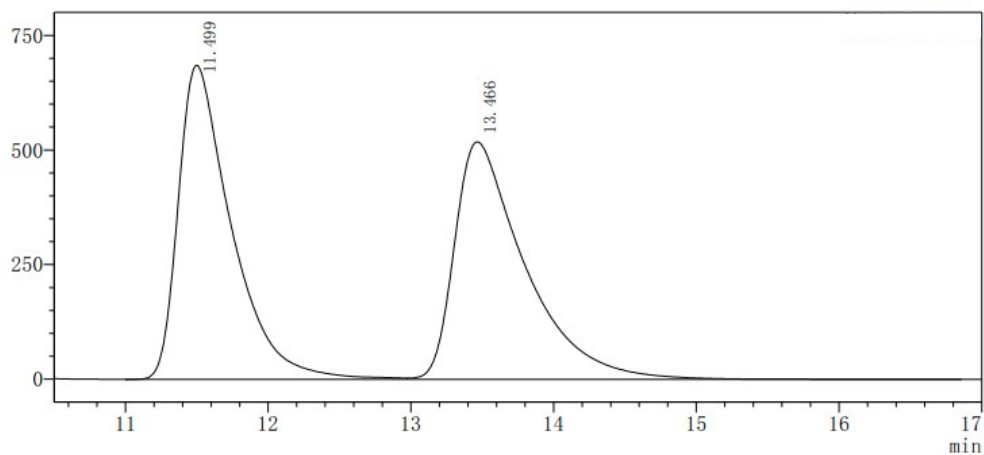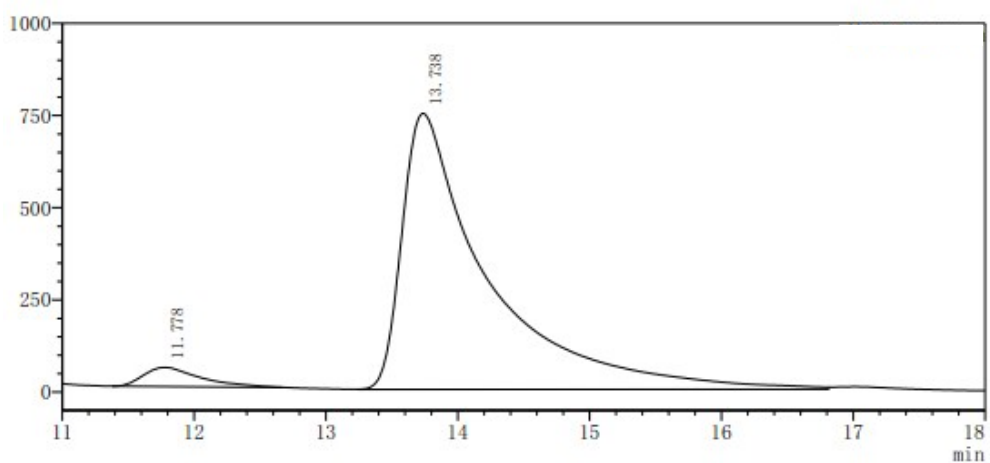

| Serial Number | Retention Time [min] | Area     | Area % |
|---------------|----------------------|----------|--------|
| 1             | 11.778               | 1547902  | 4.366  |
| 2             | 13.738               | 33906800 | 95.634 |

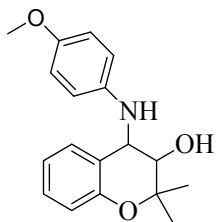

**4-(4-methoxyphenylamino)-2,2-dimethylchroman-3-ol:** Enantiomeric excess was determined by HPLC with a chiralcel AD-H column (hexane/i-PrOH = 90/10, 1.0 mL/min, 250 nm),  $t_{minor} = 16.53$  min,  $t_{major} = 19.20$  min; ee=93%.

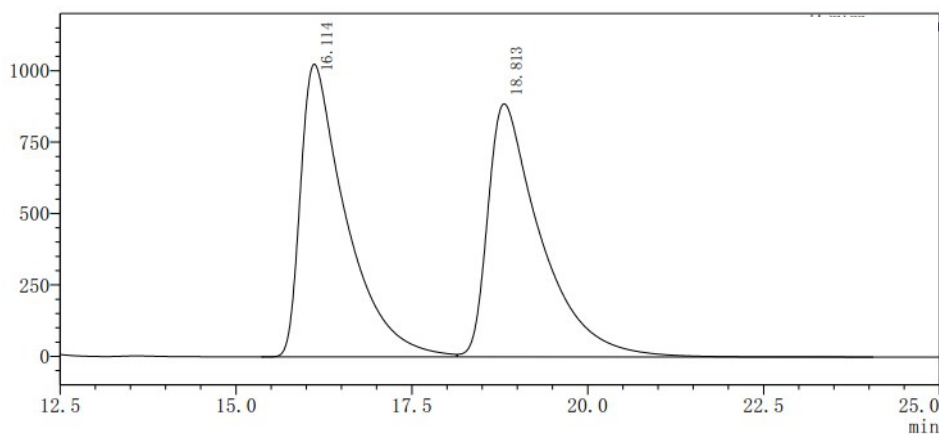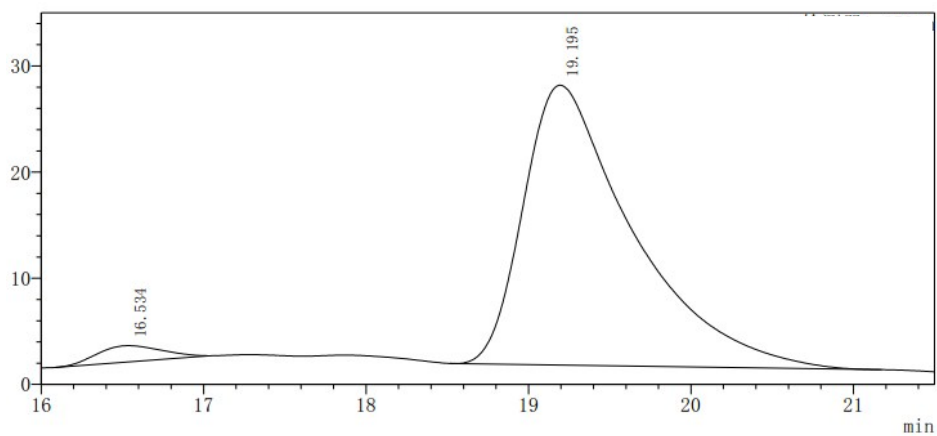

| Serial Number | Retention Time [min] | Area    | Area % |
|---------------|----------------------|---------|--------|
| 1             | 16.534               | 42425   | 3.324  |
| 2             | 19.195               | 1234025 | 96.676 |

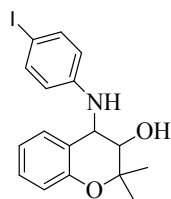

**4-(4-iodophenylamino)-2,2-dimethylchroman-3-ol:** Enantiomeric excess was determined by HPLC with a chiralcel AD-H column (hexane/*i*-PrOH = 98/2, 1.0 mL/min, 250 nm),  $t_{major} = 35.88$  min,  $t_{minor} = 49.58$  min; ee=99%.  $^1\text{H}$  NMR (400 MHz,  $\text{CDCl}_3$ )  $\delta$ : 7.43 (d,  $J = 14.8$  Hz, 2H), 7.28–7.12 (m, 2H), 6.86 (dd,  $J = 13.6, 7.6$  Hz, 2H), 6.57 (d,  $J = 8.0$  Hz, 2H), 4.46 (d,  $J = 7.4$  Hz, 1H), 3.91 (s, 1H), 3.64 (d,  $J = 8.7$  Hz, 1H), 2.67 (s, 1H), 1.51 (s, 3H), 1.34 (s, 3H).  $^{13}\text{C}$  NMR (100 MHz,  $\text{CDCl}_3$ )  $\delta$ : 152.86, 148.01, 138.39, 129.51, 127.82, 123.12, 121.18, 117.57, 115.79, 79.31, 78.36, 74.44, 54.87, 29.96, 26.85, 19.51. ESI-MS  $m/z$ : 418.0 (Calcd  $m/z$  418.03 for  $[\text{M}+\text{Na}]^+$ ).

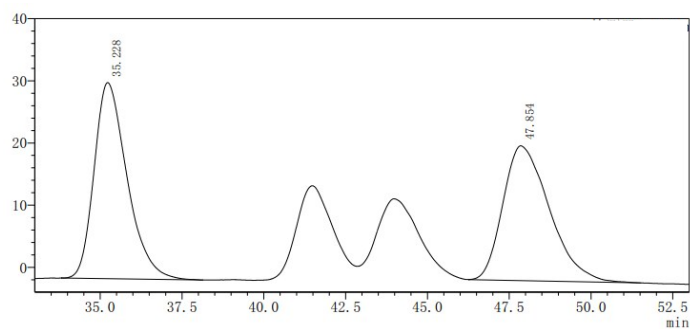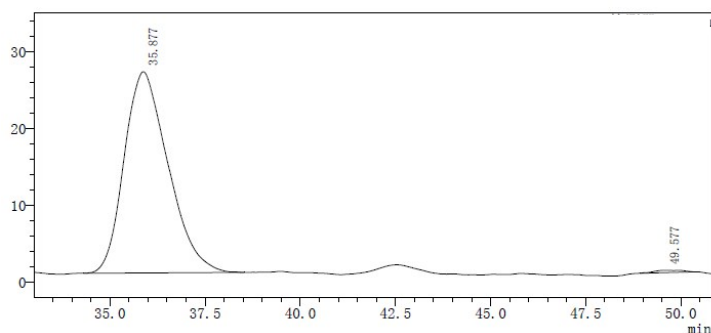

| Serial Number | Retention Time [min] | Area    | Area % |
|---------------|----------------------|---------|--------|
| 1             | 35.877               | 2100606 | 99.290 |
| 2             | 49.577               | 15020   | 0.710  |

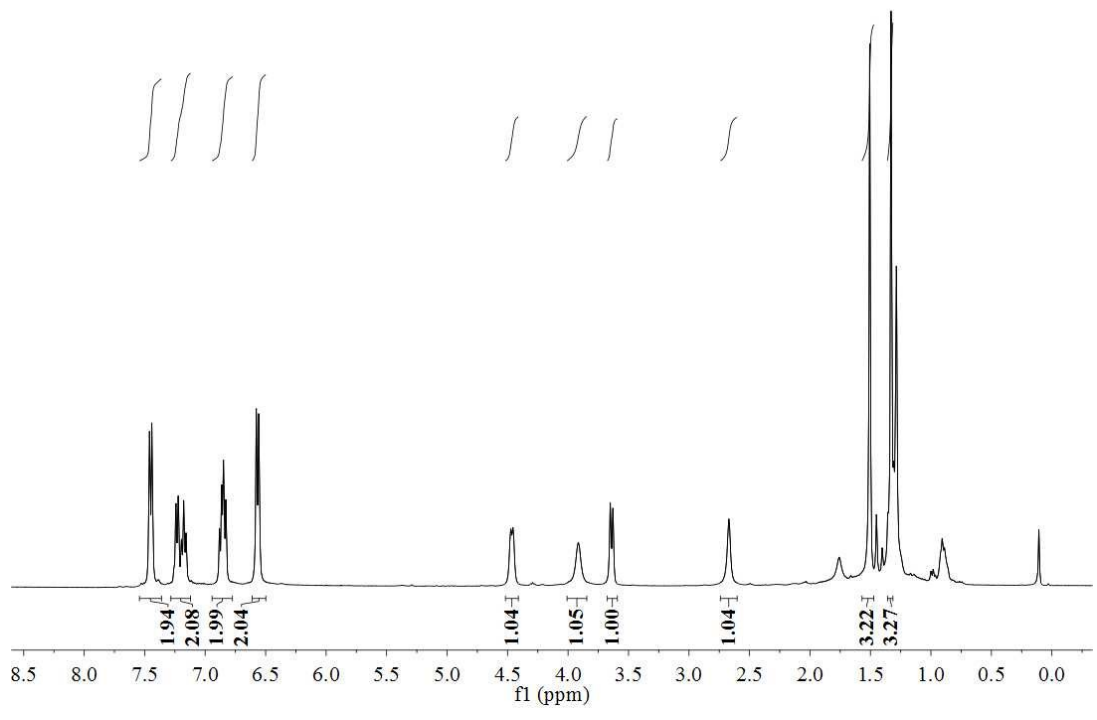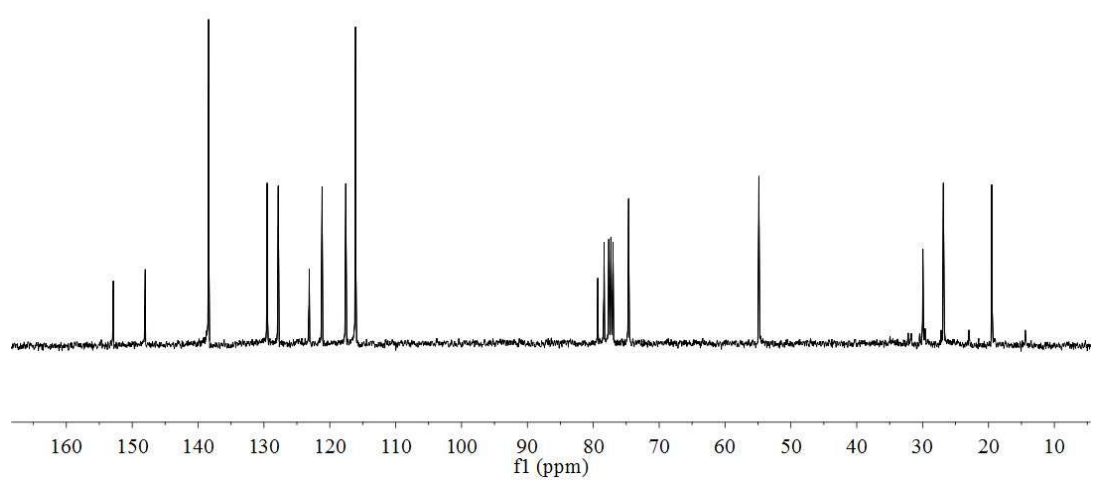

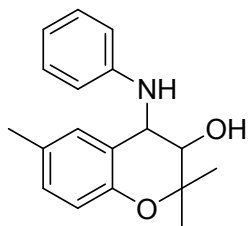

**2,2,6-trimethyl-4-(phenylamino)chroman-3-ol:** Enantiomeric excess was determined by HPLC with a chiralcel AD-H column (hexane/*i*-PrOH = 95/5, 1.0 mL/min, 250 nm),  $t_{major} = 14.40$  min,  $t_{minor} = 17.14$  min; ee=96%.

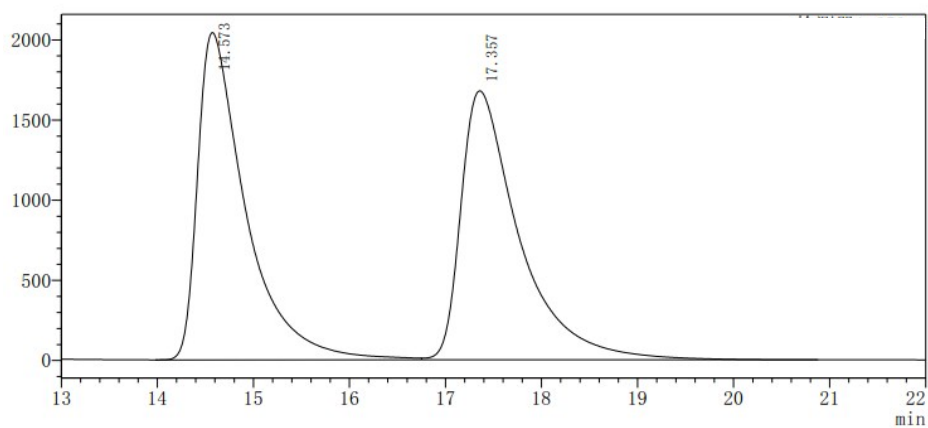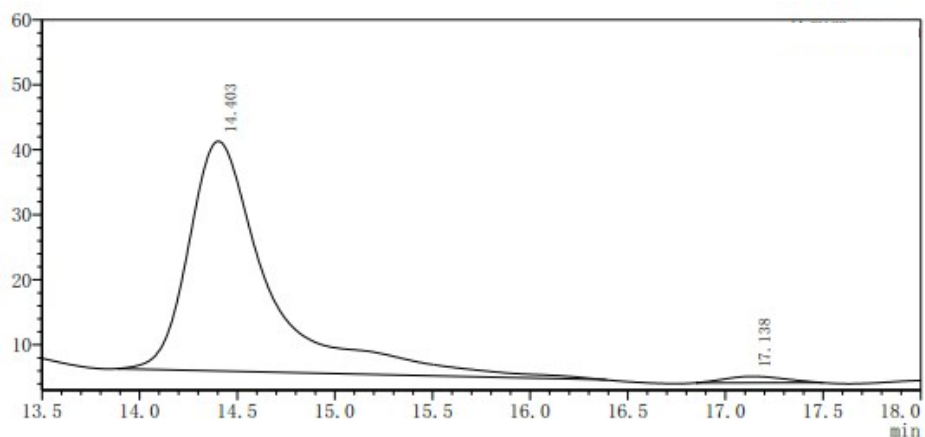

| Serial Number | Retention Time [min] | Area    | Area % |
|---------------|----------------------|---------|--------|
| 1             | 14.403               | 1019113 | 98.007 |
| 2             | 17.138               | 20727   | 1.993  |

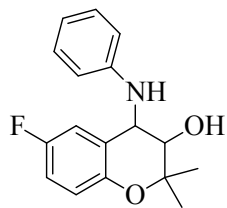

**6-fluoro-2,2-dimethyl-4-(phenylamino)chroman-3-ol:** Enantiomeric excess was determined by HPLC with a chiralcel AD-H column (hexane/*i*-PrOH = 95/5, 1.0 mL/min, 250 nm),  $t_{major} = 15.51$  min,  $t_{minor} = 22.67$  min; ee=95%.

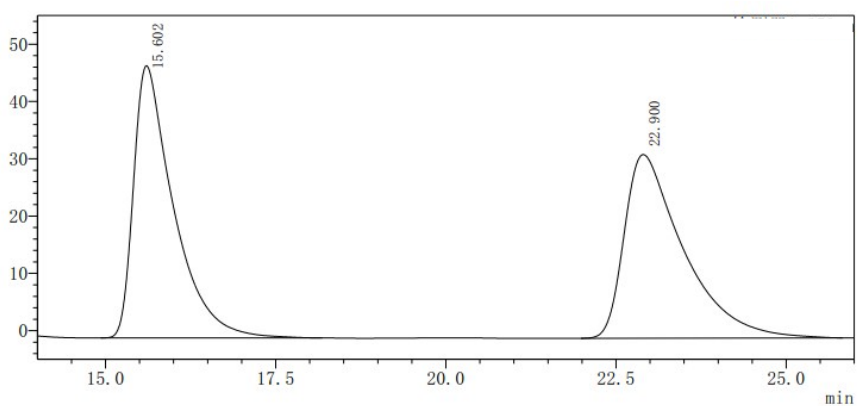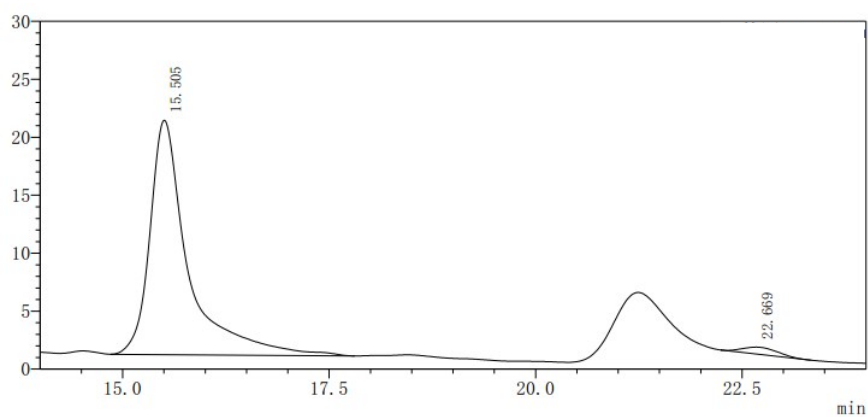

| Serial Number | Retention Time [min] | Area   | Area % |
|---------------|----------------------|--------|--------|
| 1             | 15.505               | 653486 | 97.376 |
| 2             | 22.669               | 17607  | 2.624  |

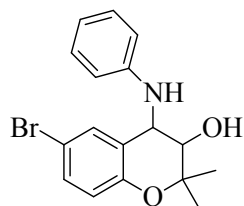



**6-bromo-2,2-dimethyl-4-(phenylamino)chroman-3-ol:** Enantiomeric excess was determined by HPLC with a chiralcel AD-H column (hexane/*i*-PrOH = 95/5, 1.0 mL/min, 250 nm),  $t_{major} = 17.69$  min,  $t_{minor} = 23.51$  min; ee=93%.

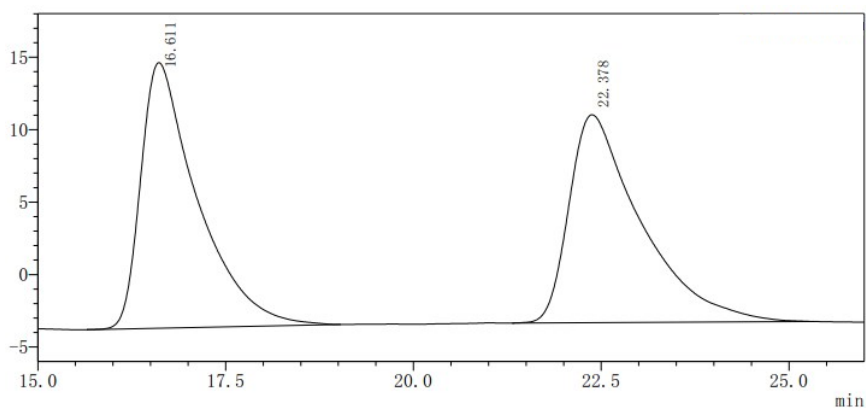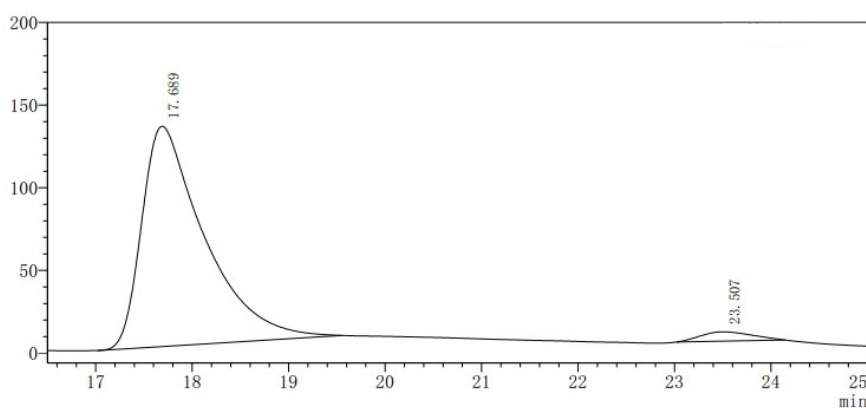

| Serial Number | Retention Time [min] | Area    | Area % |
|---------------|----------------------|---------|--------|
| 1             | 17.689               | 6020799 | 96.718 |
| 2             | 23.507               | 204335  | 3.282  |

#### 14.2 HPLC for the recycled experiment of the alkene epoxidation/epoxide aminolysis catalyzed by MOF 1a

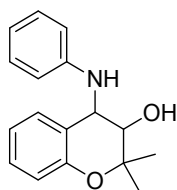

**2,2-dimethyl-4-(phenylamino)chroman-3-ol**

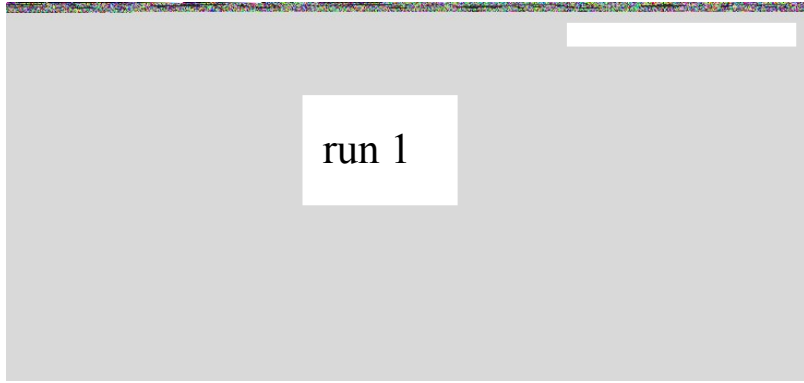

| Serial Number | Retention Time [min] | Area    | Area % |
|---------------|----------------------|---------|--------|
| 1             | 17.692               | 5126274 | 96.878 |
| 2             | 20.476               | 165179  | 3.122  |

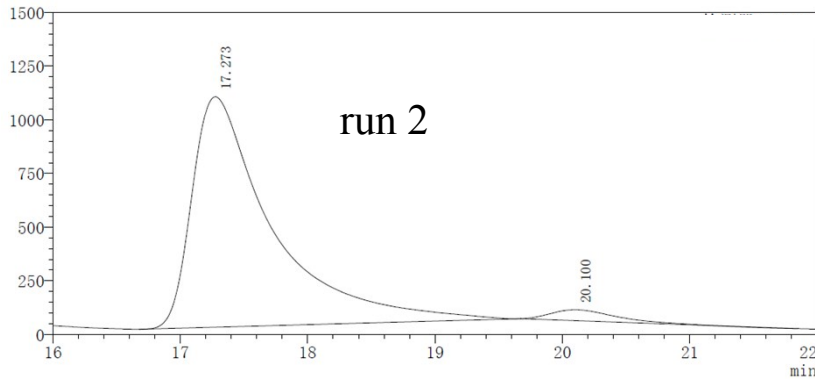

| Serial Number | Retention Time [min] | Area     | Area % |
|---------------|----------------------|----------|--------|
| 1             | 17.273               | 47164660 | 96.341 |
| 2             | 20.100               | 1791507  | 3.659  |

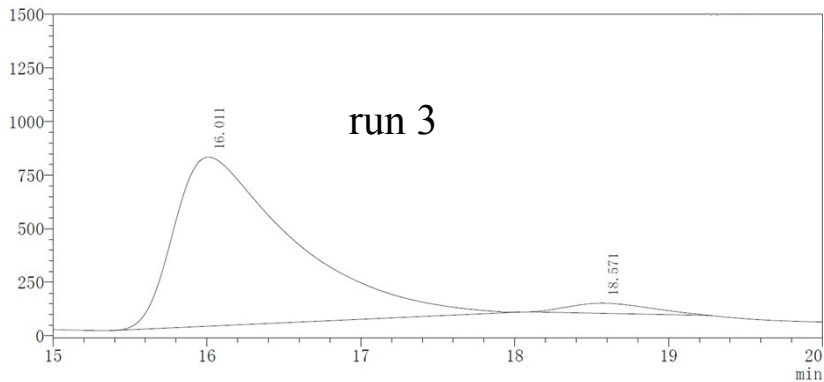

| Serial Number | Retention Time [min] | Area     | Area % |
|---------------|----------------------|----------|--------|
| 1             | 16.011               | 42673030 | 95.991 |
| 2             | 18.571               | 1782265  | 4.009  |

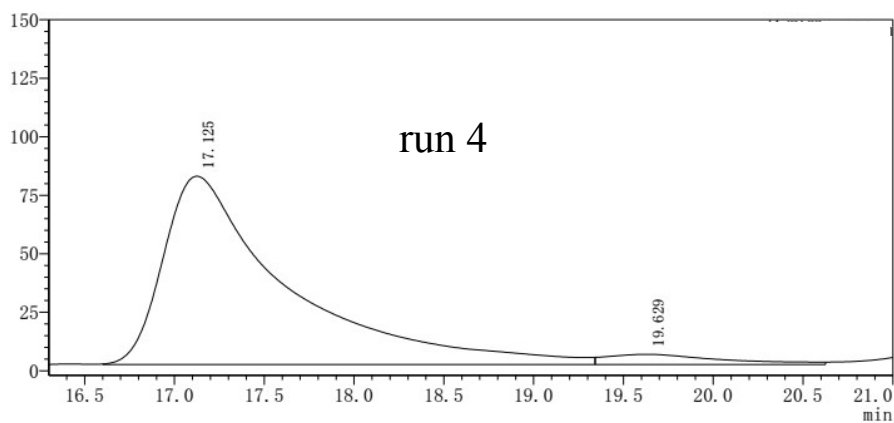

| Serial Number | Retention Time [min] | Area    | Area % |
|---------------|----------------------|---------|--------|
| 1             | 17.125               | 3866865 | 95.259 |
| 2             | 19.629               | 192456  | 4.741  |

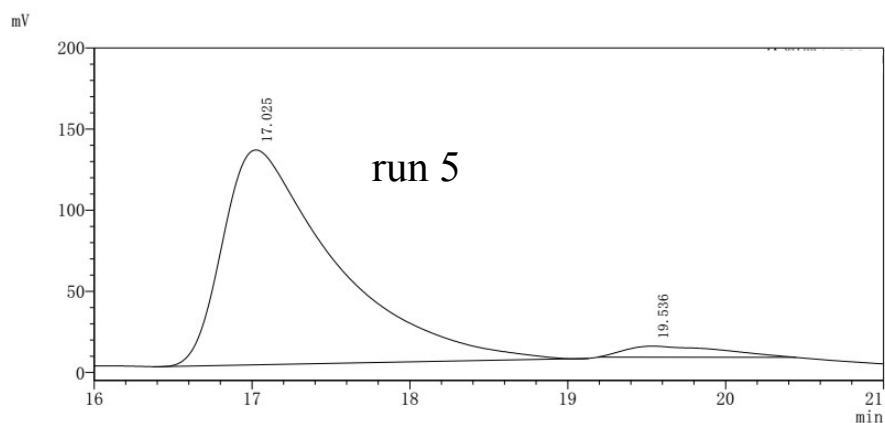

| Serial Number | Retention Time [min] | Area    | Area % |
|---------------|----------------------|---------|--------|
| 1             | 17.025               | 6549950 | 95.710 |
| 2             | 19.536               | 293620  | 4.290  |

### 14.3 HPLC for the the alkene epoxidation/epoxide aminolysis catalyzed by MOF

1

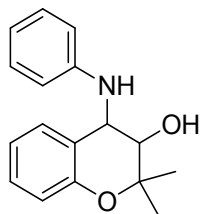

**2,2-dimethyl-4-(phenylamino)chroman-3-ol:** Enantiomeric excess was determined by HPLC with a chiralcel AD-H column (hexane/*i*-PrOH = 95/5, 1.0 mL/min, 250 nm),  $t_{\text{minor}} = 17.00$  min,  $t_{\text{major}} = 19.68$  min; ee=92%.

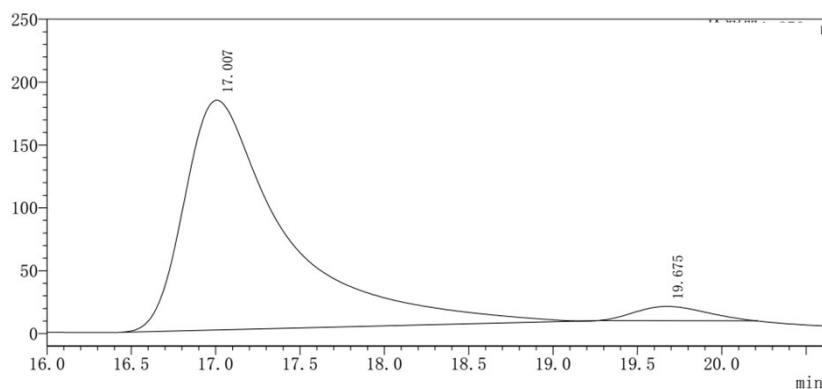

| Serial Number | Retention Time [min] | Area    | Area % |
|---------------|----------------------|---------|--------|
| 1             | 17.007               | 7641920 | 95.816 |
| 2             | 19.675               | 333719  | 4.184  |

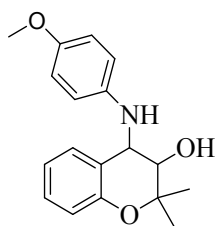

**4-(4-methoxyphenylamino)-2,2-dimethylchroman-3-ol:** Enantiomeric excess was determined by HPLC with a chiralcel AD-H column (hexane/*i*-PrOH = 90/10, 1.0 mL/min, 250 nm),  $t_{\text{minor}} = 15.53$  min,  $t_{\text{major}} = 17.75$  min; ee=90%.

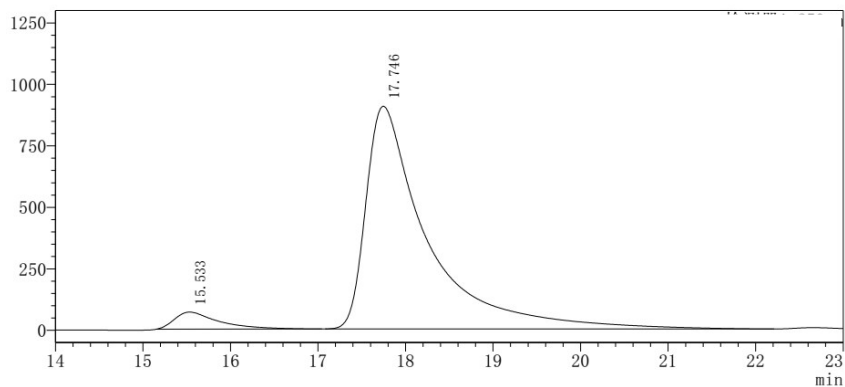

| Serial Number | Retention Time [min] | Area     | Area % |
|---------------|----------------------|----------|--------|
| 1             | 15.533               | 2444930  | 5.221  |
| 2             | 17.746               | 44388087 | 94.779 |

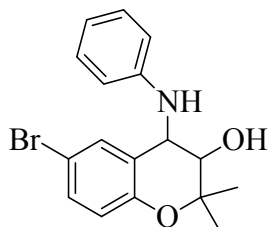

**6-bromo-2,2-dimethyl-4-(phenylamino)chroman-3-ol:** Enantiomeric excess was determined by HPLC with a chiralcel AD-H column (hexane/*i*-PrOH = 95/5, 1.0 mL/min, 250 nm),  $t_{major} = 16.65$  min,  $t_{minor} = 21.99$  min; ee=91%.

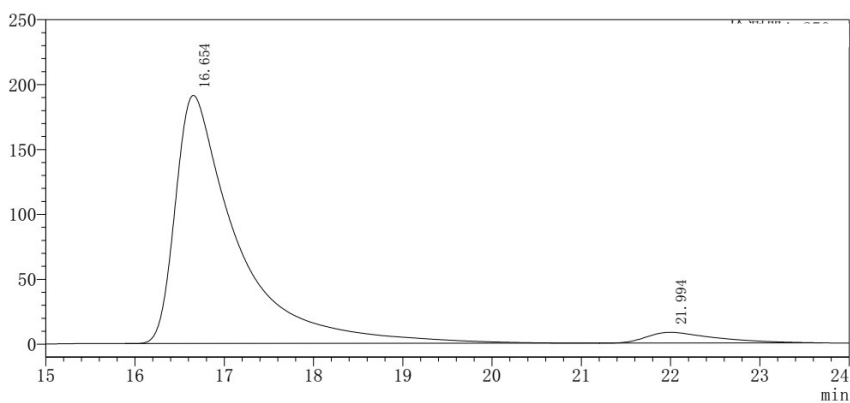

| Serial Number | Retention Time [min] | Area    | Area % |
|---------------|----------------------|---------|--------|
| 1             | 16.654               | 9221538 | 95.389 |
| 2             | 21.994               | 445729  | 4.611  |

#### 14.4 HPLC for the the alkene epoxidation/epoxide aminolysis catalyzed by the homogenous 1 eq:1 mixture of Fe(salen) and VVO(salen)

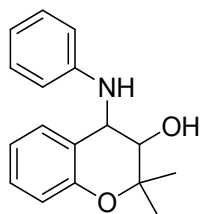

**2,2-dimethyl-4-(phenylamino)chroman-3-ol:** Enantiomeric excess was determined by HPLC with a chiralcel AD-H column (hexane/*i*-PrOH = 95/5, 1.0 mL/min, 250 nm),  $t_{major} = 17.91$  min,  $t_{minor} = 20.51$  min; ee=90%.

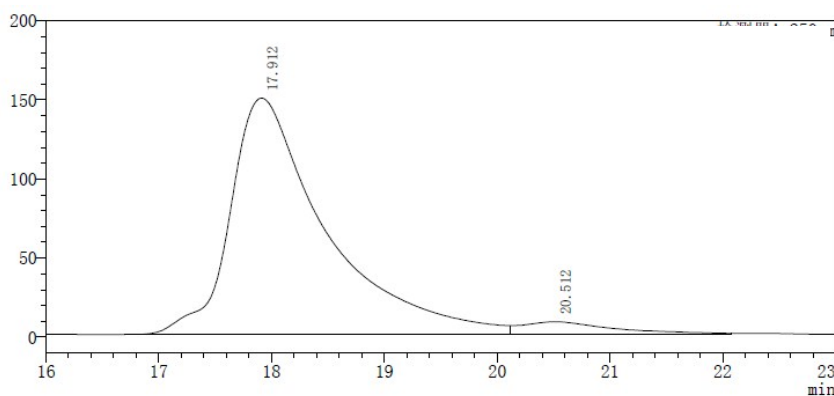

| Serial Number | Retention Time [min] | Area    | Area % |
|---------------|----------------------|---------|--------|
| 1             | 17.912               | 8842529 | 95.009 |
| 2             | 20.512               | 464557  | 4.991  |

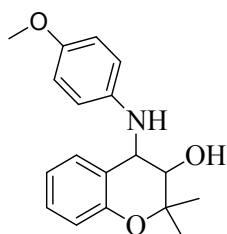

**4-(4-methoxyphenylamino)-2,2-dimethylchroman-3-ol:** Enantiomeric excess was determined by HPLC with a chiralcel AD-H column (hexane/*i*-PrOH = 90/10, 1.0 mL/min, 250 nm),  $t_{minor} = 15.61$  min,  $t_{major} = 17.83$  min; ee=89%.

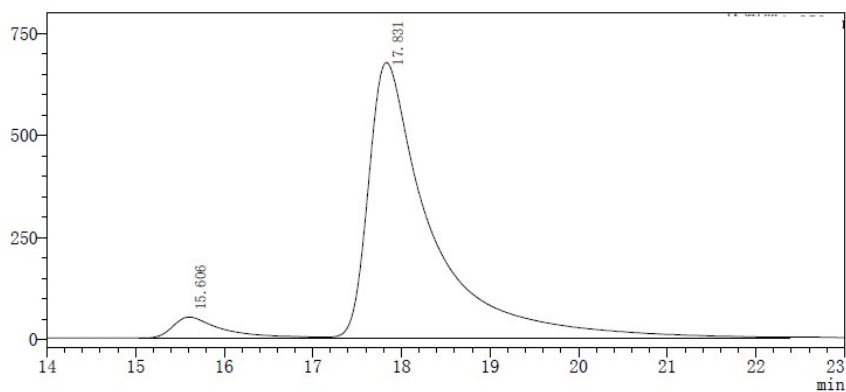

| Serial Number | Retention Time [min] | Area     | Area % |
|---------------|----------------------|----------|--------|
| 1             | 15.606               | 2043212  | 5.735  |
| 2             | 17.831               | 33582458 | 94.265 |

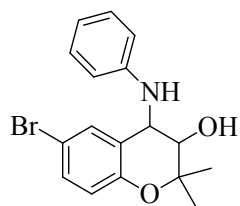

**6-bromo-2,2-dimethyl-4-(phenylamino)chroman-3-ol:** Enantiomeric excess was determined by HPLC with a chiralcel AD-H column (hexane/*i*-PrOH = 95/5, 1.0 mL/min, 250 nm),  $t_{major} = 16.55$  min,  $t_{minor} = 21.79$  min; ee=90%.

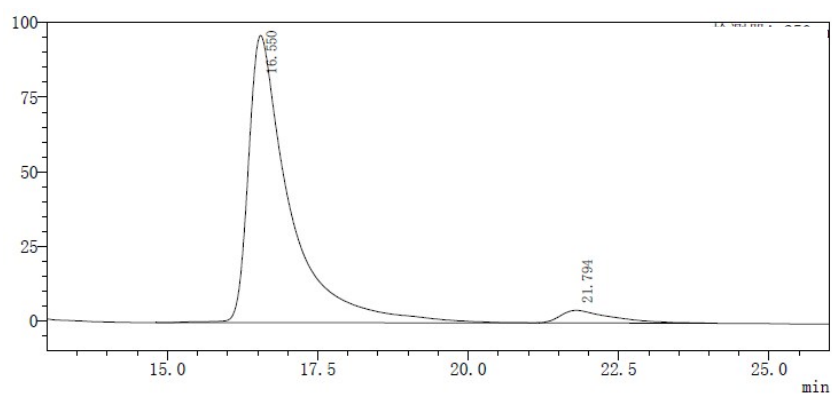

| Serial Number | Retention Time [min] | Area    | Area % |
|---------------|----------------------|---------|--------|
| 1             | 16.550               | 4611851 | 94.939 |
| 2             | 21.794               | 245865  | 5.061  |

#### 14.5 HPLC for the epoxide aminolysis catalyzed by the homogenous Fe(salen)

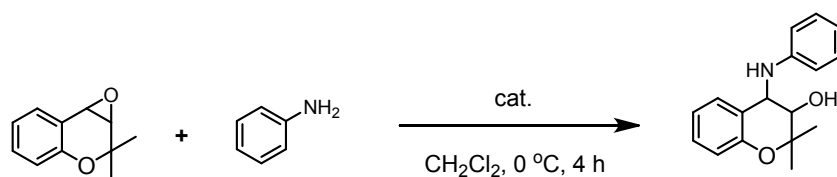

**2,2-dimethyl-4-(phenylamino)chroman-3-ol:** Enantiomeric excess was determined by HPLC with a chiralcel AD-H column (hexane/*i*-PrOH = 95/5, 1.0 mL/min, 250 nm),  $t_{major} = 16.18$  min,  $t_{minor} = 18.81$  min; ee=11%.

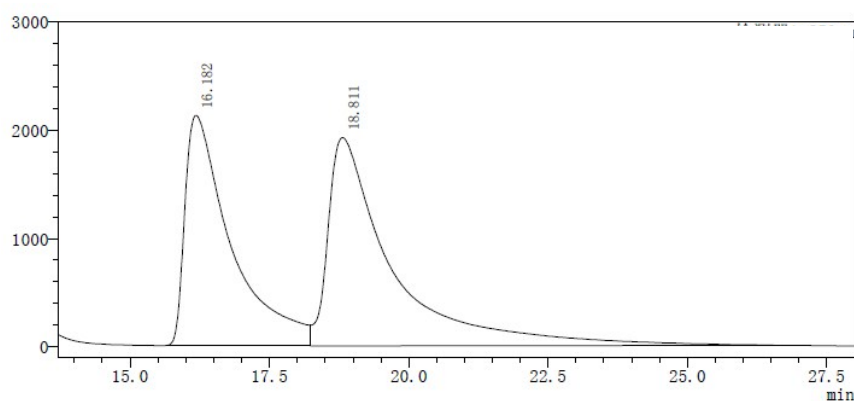

| Serial Number | Retention Time [min] | Area      | Area % |
|---------------|----------------------|-----------|--------|
| 1             | 16.182               | 122229855 | 44.297 |
| 2             | 18.811               | 153700516 | 55.703 |

Enantiomeric excess was determined by HPLC with a chiralcel AD-H column (hexane/*i*-PrOH = 95/5, 1.0 mL/min, 250 nm),  $t_{major} = 15.91$  min,  $t_{minor} = 18.54$  min; ee = 12%.

#### 14.6 HPLC for the epoxide aminolysis catalyzed by the homogenous V<sup>VO</sup>(salen)

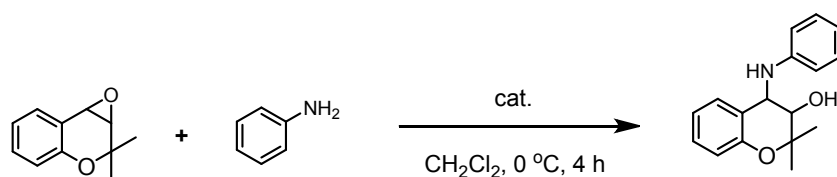



**2,2-dimethyl-4-(phenylamino)chroman-3-ol:** Enantiomeric excess was determined by HPLC with a chiralcel AD-H column (hexane/*i*-PrOH = 95/5, 1.0 mL/min, 250 nm),  $t_{major} = 16.18$  min,  $t_{minor} = 18.81$  min; ee=12%.

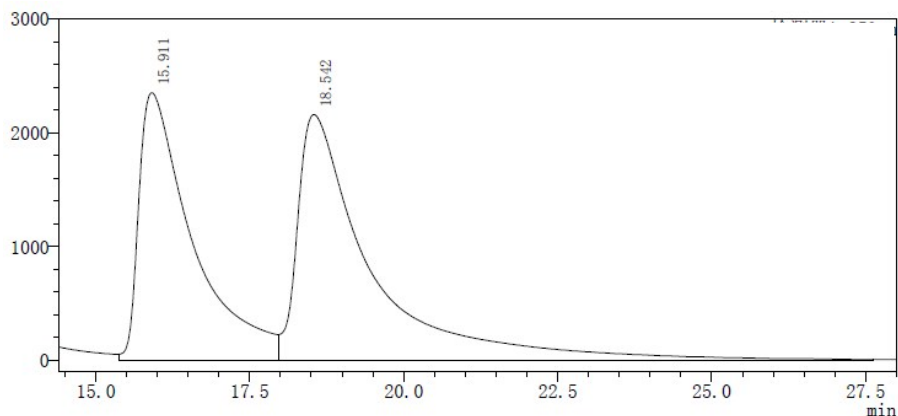

| Serial Number | Retention Time [min] | Area      | Area % |
|---------------|----------------------|-----------|--------|
| 1             | 15.911               | 141705510 | 44.153 |
| 2             | 18.542               | 179238952 | 55.847 |

#### 14.7 HPLC for the alkene epoxidation/epoxide hydrolysis catalyzed by the MOF

2

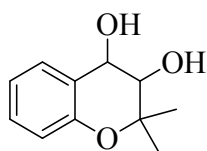

**2,2-dimethyl-3,4-dihydro-2H-chromene-3,4-diol:** Enantiomeric excess was determined by HPLC with a chiralcel OD-H column (hexane/*i*-PrOH = 98/2, 1.5 mL/min, 230 nm),  $t_{minor} = 24.00$  min,  $t_{major} = 30.65$  min; ee=81%.

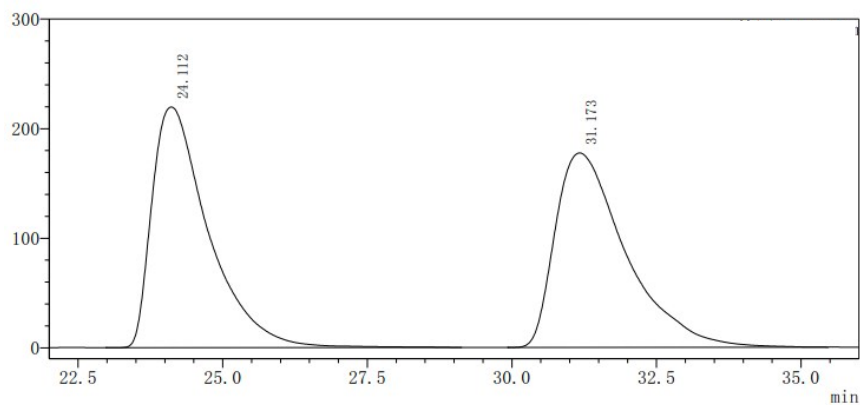

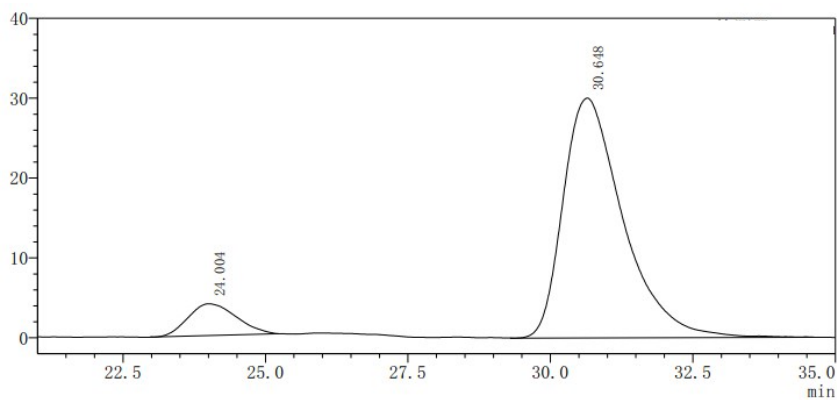

| Serial Number | Retention Time [min] | Area    | Area % |
|---------------|----------------------|---------|--------|
| 1             | 24.004               | 233560  | 9.610  |
| 2             | 30.648               | 2196705 | 90.390 |

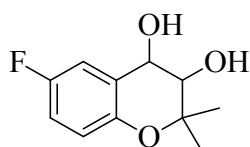

**6-fluoro-2,2-dimethyl-3,4-dihydro-2H-chromene-3,4-diol:** Enantiomeric excess was determined by HPLC with a chiralcel OD-H column (hexane/*i*-PrOH = 98/2, 1.5 mL/min, 220 nm),  $t_{minor} = 21.62$  min,  $t_{major} = 33.16$  min; ee=89%.

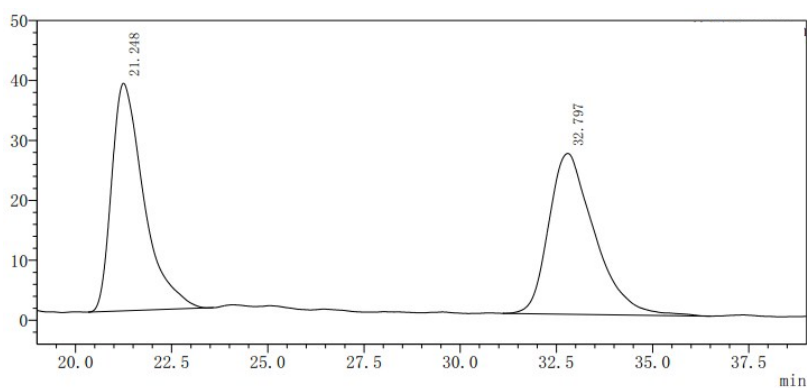

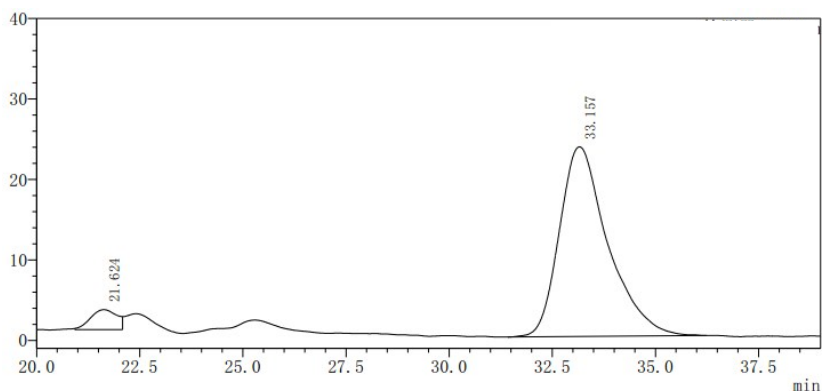

| Serial Number | Retention Time [min] | Area    | Area % |
|---------------|----------------------|---------|--------|
| 1             | 21.624               | 112078  | 5.501  |
| 2             | 33.157               | 1925344 | 94.499 |

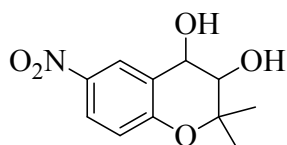

**2,2-dimethyl-6-nitro-3,4-dihydro-2H-chromene-3,4-diol:** Enantiomeric excess was determined by HPLC with a chiralcel OD-H column (hexane/*i*-PrOH = 95/5, 1.0 mL/min, 220 nm),  $t_{major} = 12.50$  min,  $t_{minor} = 15.31$  min; ee=90%.  $^1\text{H}$  NMR (400 MHz,  $\text{CDCl}_3$ )  $\delta$ : 8.41 (dd,  $J = 2.7, 0.9$  Hz, 1H), 8.07 (dd,  $J = 9.1, 2.8$  Hz, 1H), 6.86 (d,  $J = 9.1$  Hz, 1H), 4.64 (d,  $J = 8.3$  Hz, 1H), 3.64 (d,  $J = 8.9$  Hz, 1H), 2.84 (s, 1H), 1.54 (s, 3H), 1.27 (s, 3H).  $^{13}\text{C}$  NMR (100 MHz,  $\text{CDCl}_3$ )  $\delta$ : 157.77, 141.60, 125.44, 124.24, 123.77, 117.38, 80.35, 75.37, 68.54, 26.61, 19.10. ESI-MS  $m/z$ : 239.1 (Calcd  $m/z$  239.08 for  $[\text{M}+\text{Na}]^+$ ).

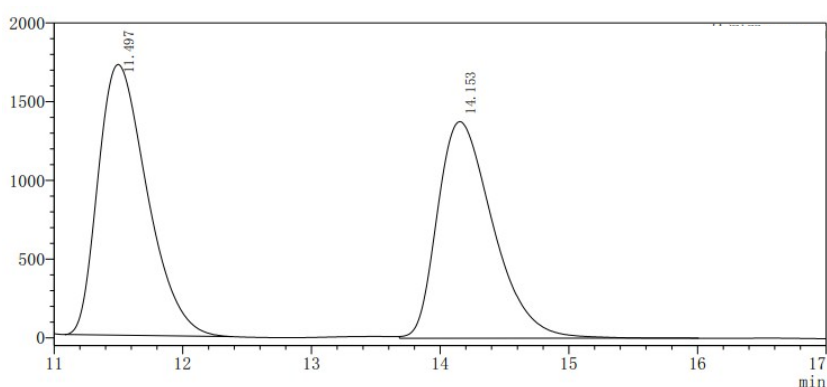

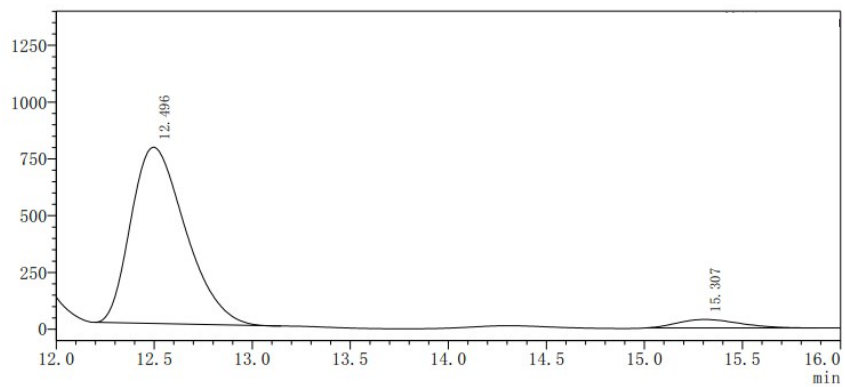

| Serial Number | Retention Time [min] | Area     | Area % |
|---------------|----------------------|----------|--------|
| 1             | 12.496               | 15031846 | 94.873 |
| 2             | 15.307               | 812312   | 5.127  |

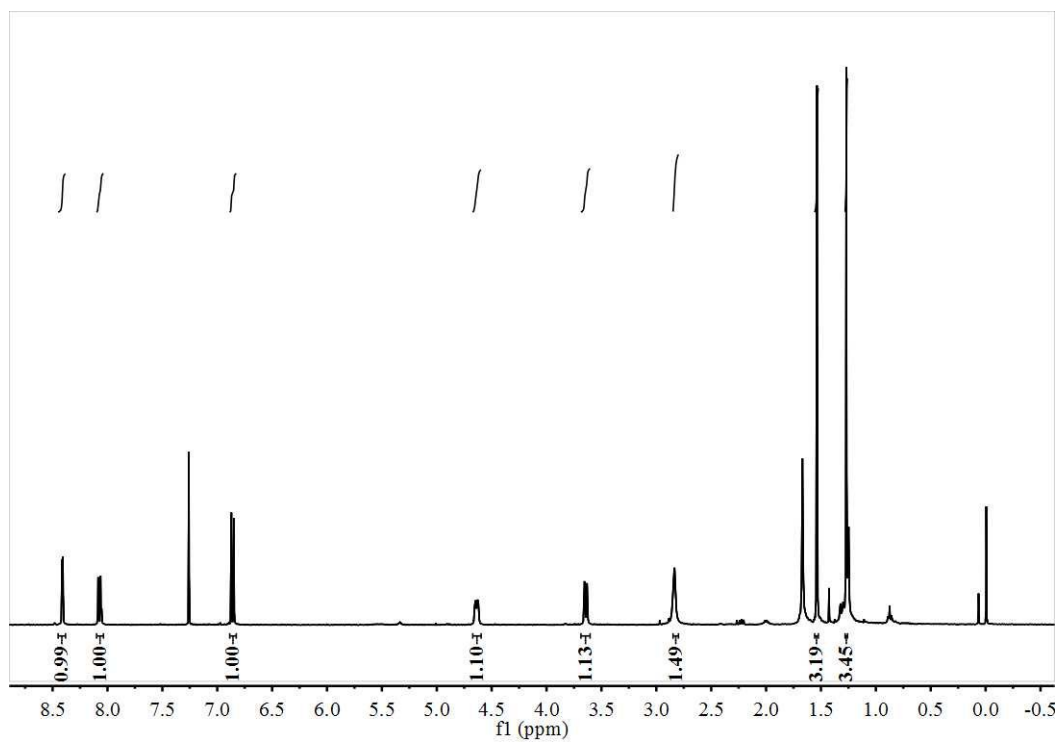

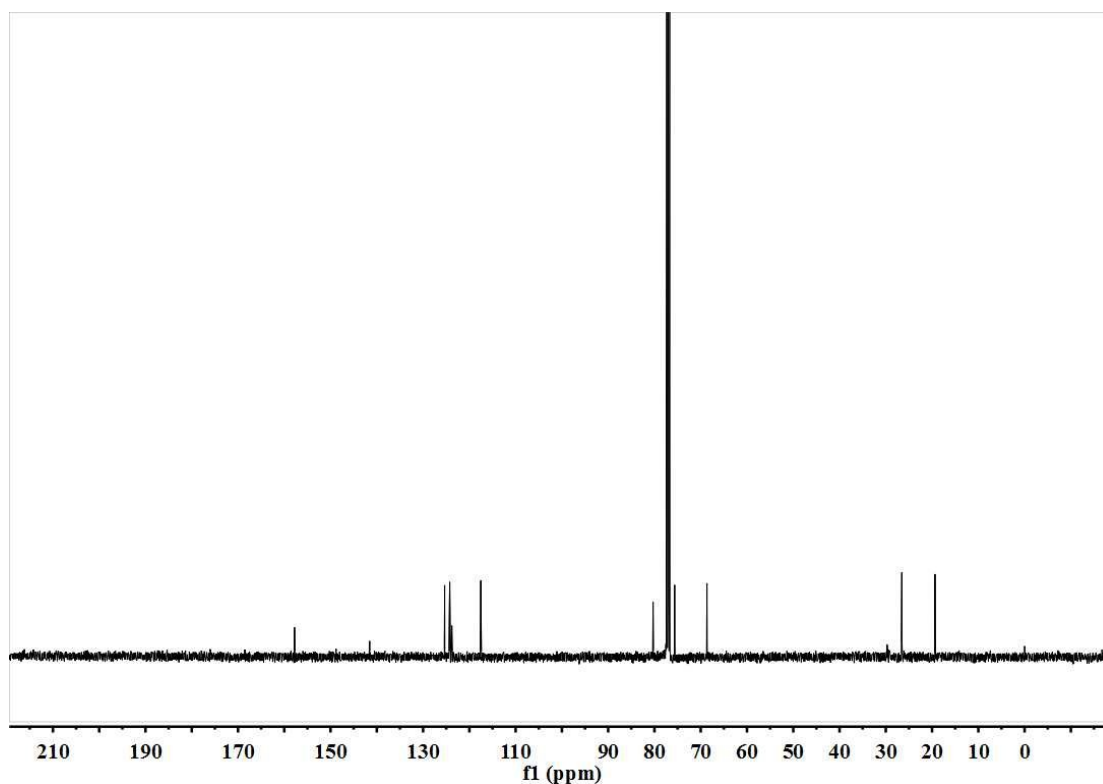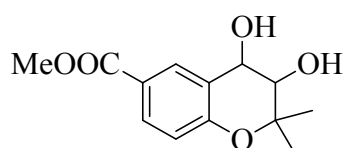

**Methyl 3,4-dihydroxy-2,2-dimethyl-3,4-dihydro-2H-chromene-6-carboxylate:**  
 Enantiomeric excess was determined by HPLC with a chiralcel OD-H column (hexane/*i*-PrOH = 98/2, 1.5 mL/min, 220 nm),  $t_{major} = 10.59$  min,  $t_{minor} = 14.06$  min; ee=87%.  $^1\text{H}$  NMR (400 MHz,  $\text{CDCl}_3$ )  $\delta$ : 8.10 (s,  $J = 1.3$  Hz, 1H), 7.75 (dd,  $J = 8.6$ , 1.9 Hz, 1H), 6.73 (d,  $J = 11.0$  Hz, 1H), 4.56 (d,  $J = 8.9$  Hz, 1H), 3.80 (s, 3H), 3.59 (d,  $J = 8.9$  Hz, 1H), 3.02 (s, 1H), 1.44 (s,  $J = 12.5$  Hz, 3H), 1.15 (s, 3H).  $^{13}\text{C}$  NMR (100 MHz,  $\text{CDCl}_3$ )  $\delta$ : 167.47, 156.70, 131.06, 130.17, 123.82, 122.34, 116.80, 79.82, 75.63, 69.09, 52.21, 26.79, 19.20. ESI-MS  $m/z$ : 252.0 (Calcd  $m/z$  252.10 for  $[\text{M}+\text{Na}]^+$ ).

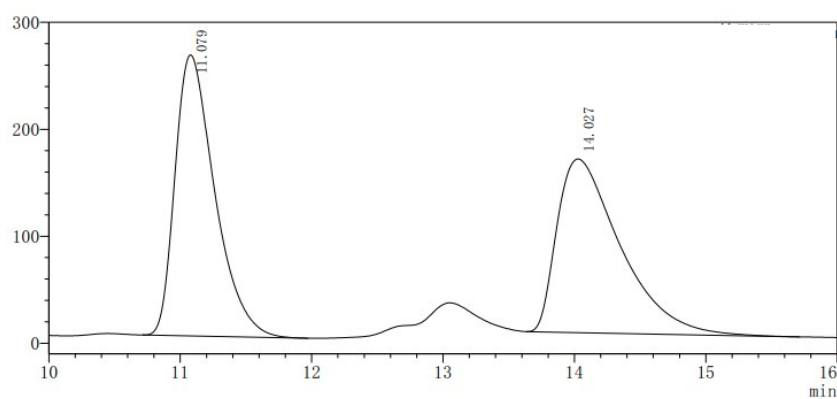

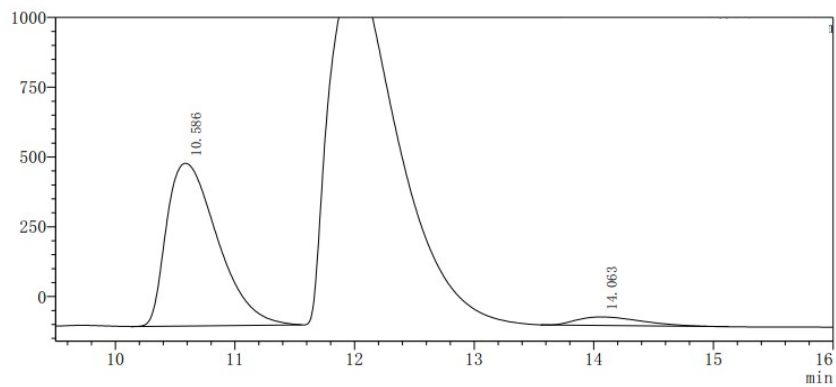

| Serial Number | Retention Time [min] | Area     | Area % |
|---------------|----------------------|----------|--------|
| 1             | 10.586               | 17280251 | 93.700 |
| 2             | 14.063               | 1161798  | 6.300  |

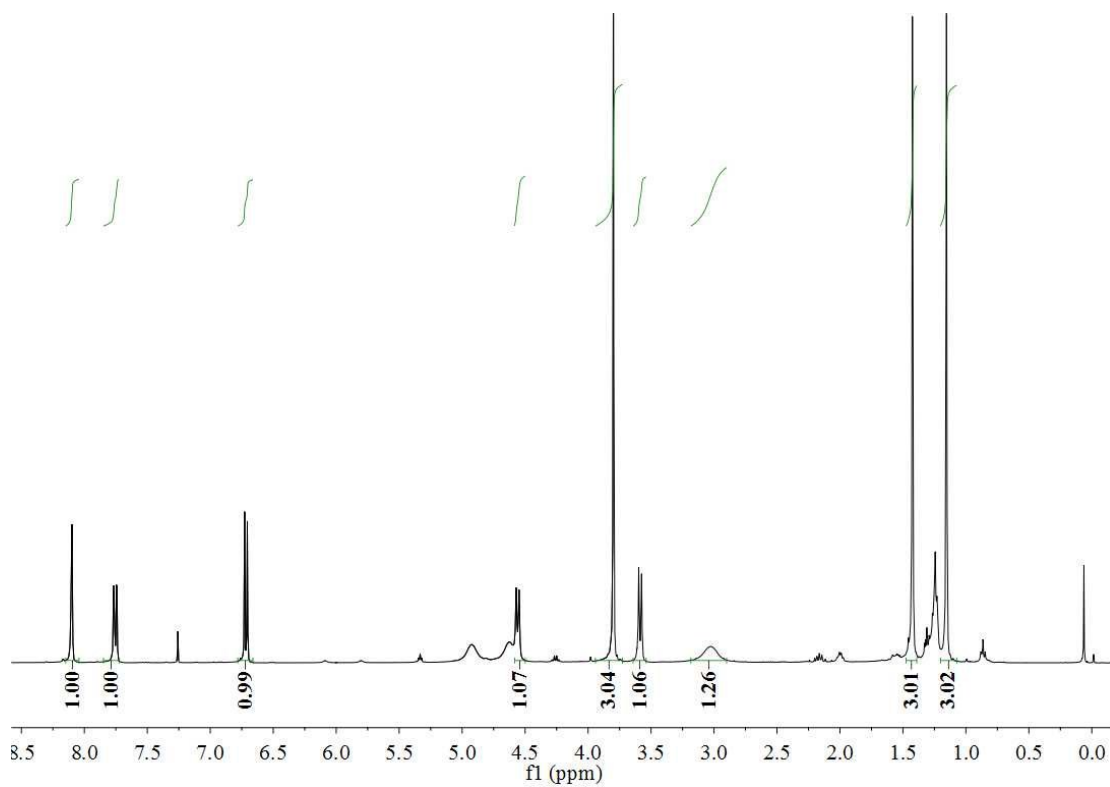

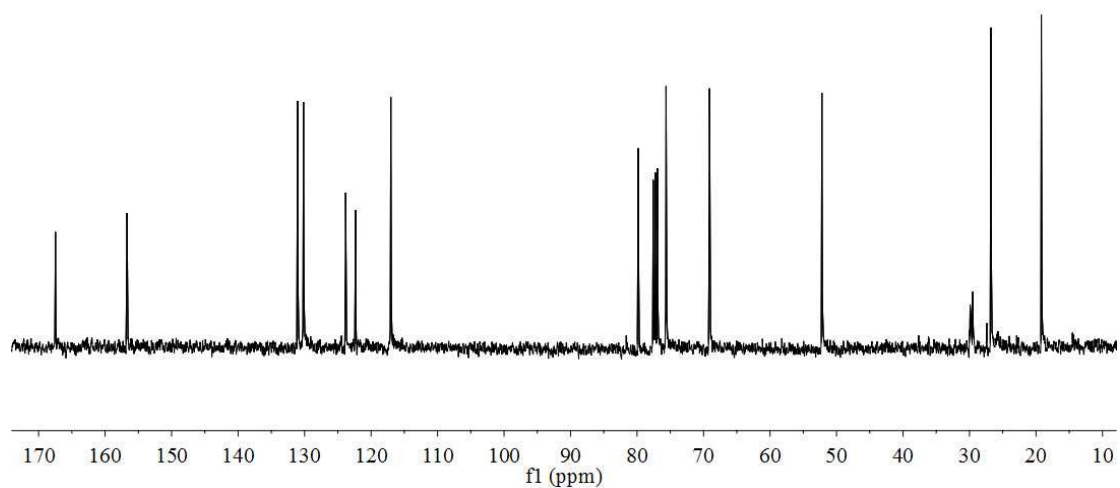

**14.8 HPLC for the recycled experiment of the alkene epoxidation/epoxide hydrolysis catalyzed by MOF 2**

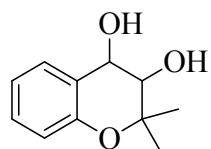

**2,2-dimethyl-3,4-dihydro-2H-chromene-3,4-diol**

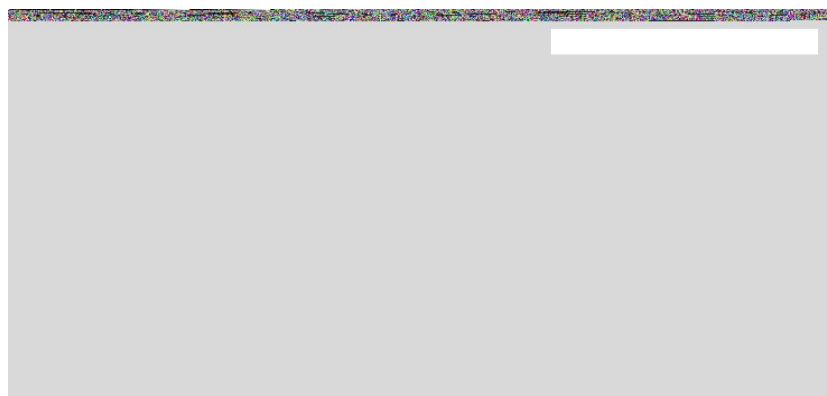

run 1

| Serial Number | Retention Time [min] | Area    | Area % |
|---------------|----------------------|---------|--------|
| 1             | 24.004               | 233560  | 9.610  |
| 2             | 30.648               | 2196705 | 90.390 |

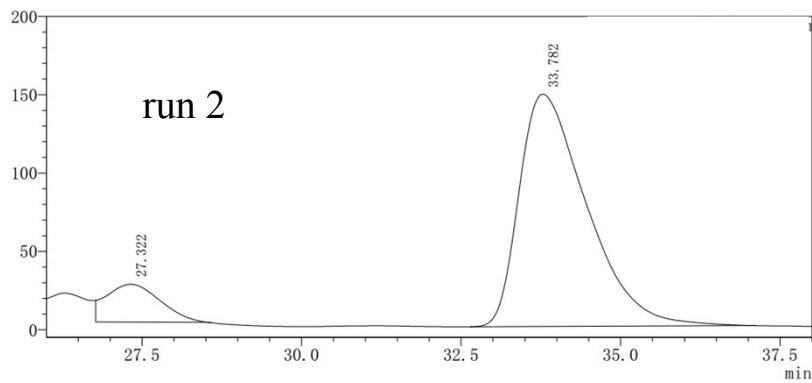

| Serial Number | Retention Time [min] | Area     | Area % |
|---------------|----------------------|----------|--------|
| 1             | 27.322               | 1410776  | 11.423 |
| 2             | 33.782               | 10939117 | 88.577 |

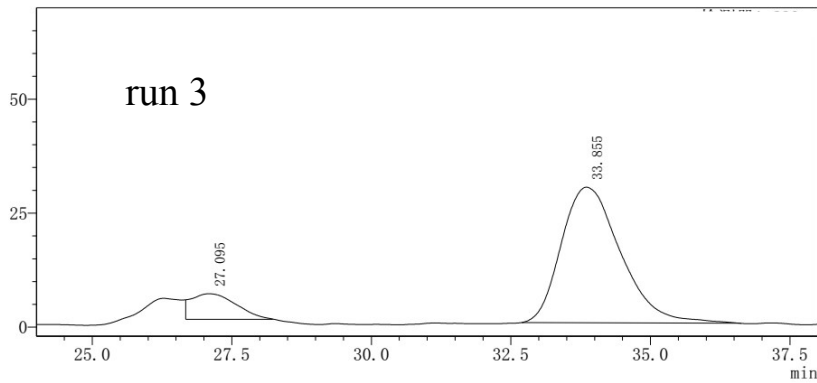

| Serial Number | Retention Time [min] | Area | Area % |
|---------------|----------------------|------|--------|
|---------------|----------------------|------|--------|



|   |        |         |        |
|---|--------|---------|--------|
| 1 | 27.095 | 312840  | 12.463 |
| 2 | 33.855 | 2197254 | 87.537 |

**14.9 HPLC for the the alkene epoxidation/ epoxide hydrolysis catalyzed by the homogenous 1 eq:1 eq mixture of Mn(salen) and VO(salen)**

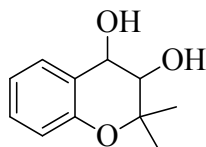

**2,2-dimethyl-3,4-dihydro-2H-chromene-3,4-diol:** Enantiomeric excess was determined by HPLC with a chiralcel OD-H column (hexane/i-PrOH = 97/3, 1.5 mL/min, 220 nm),  $t_{major} = 20.00$  min,  $t_{minor} = 16.55$  min; ee=79%.

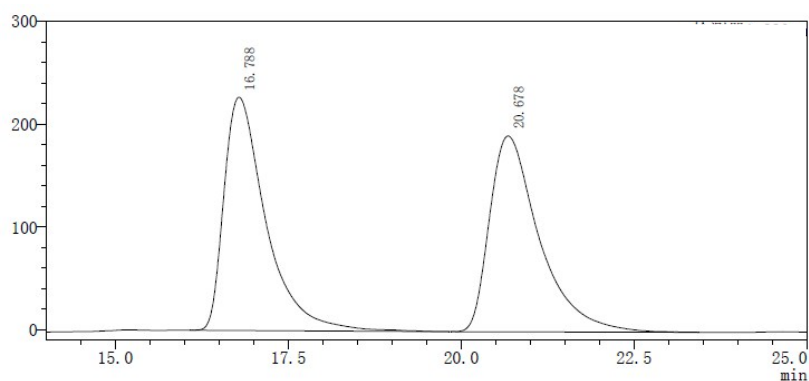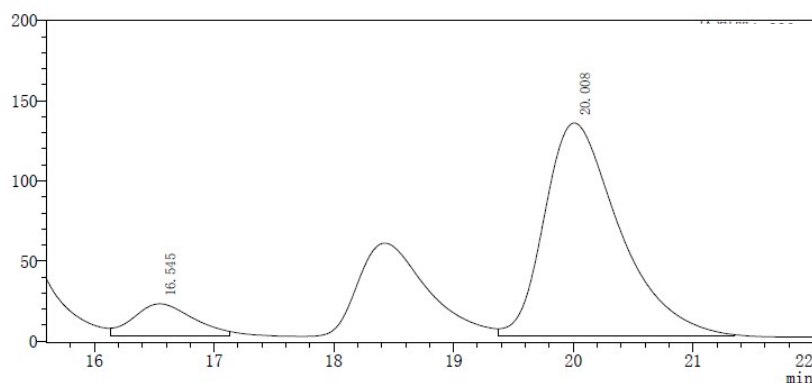

| Serial Number | Retention Time [min] | Area    | Area % |
|---------------|----------------------|---------|--------|
| 1             | 16.545               | 684881  | 10.624 |
| 2             | 20.008               | 5761944 | 89.376 |

## 15. Additional results for catalysis

**15.1 Table S4.** Reported results of related asymmetric epoxidation of alkenes.

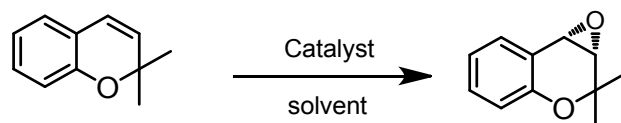

| Entry | Catalyst                                                                                   | system        | Oxidant                       | Conv.(%) | ee(%) |
|-------|--------------------------------------------------------------------------------------------|---------------|-------------------------------|----------|-------|
| 1     | Mn(salen)Cl <sup>S5</sup>                                                                  | Homogeneous   | NaClO                         | 87       | 98    |
| 2     | Mn-salen complexes <sup>S6</sup>                                                           |               | H <sub>2</sub> O <sub>2</sub> | 80       | 98    |
| 3     | Mn(salen)-L <sub>3</sub> -Me <sub>2</sub> <sup>S7</sup>                                    |               | sPhIO                         | 90       | 92    |
| 4     | Zn <sub>2</sub> (CO <sub>2</sub> ) <sub>4</sub> N <sub>2</sub> Mn(salen)-MOF <sup>S8</sup> | Heterogeneous | sPhIO                         | 71       | 82    |
| 5     | Zn <sub>4</sub> O-Mn(salen)-MOF <sup>S7</sup>                                              |               | sPhIO                         | 82       | 92    |
| 6     | Mn(salen)-polymer <sup>S9</sup>                                                            |               | NaClO                         | 90       | 95    |

**15.2 Table S5.** Reported results of related asymmetric epoxidation/aminolysis reactions

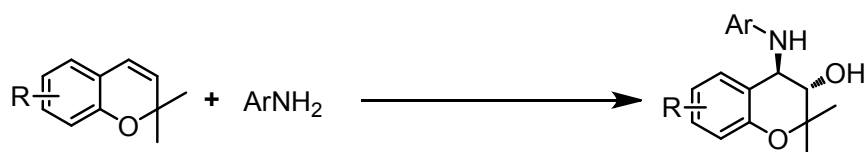

| Entry | Catalyst                                                               | system        | R                                         | Ar      | Conversion(%) | ee(%) |
|-------|------------------------------------------------------------------------|---------------|-------------------------------------------|---------|---------------|-------|
| 1     | (R)-Me <sub>2</sub> LMnCl and (R)-Me <sub>2</sub> LCrCCl <sup>S4</sup> | Homogeneous   | 6-H                                       | Ph      | 80            | 92    |
| 2     | Salen <sup>CuMnCr</sup> -MTV-MOF <sup>S4</sup>                         | Heterogeneous | 6-H                                       | Ph      | 84            | 94    |
| 3     |                                                                        |               | 6-H                                       | 2-OMePh | 86            | 90    |
| 4     |                                                                        |               | 6-H                                       | 4-OMe   | 95            | 89    |
| 5     |                                                                        |               | 6-H                                       | 3-Me    | 85            | 92    |
| 6     |                                                                        |               | 6-Me                                      | Ph      | 77            | 85    |
| 7     |                                                                        |               | 6-F                                       | Ph      | 93            | 97    |
| 8     |                                                                        |               | 6-Br                                      | Ph      | 89            | 96    |
| 9     |                                                                        |               | Salen <sup>CrMn</sup> -COF <sup>S10</sup> |         | 6-H           | Ph    |

**15.3 Table S6.** Reported results of related asymmetric epoxidation/ hydrolysis of alkenes

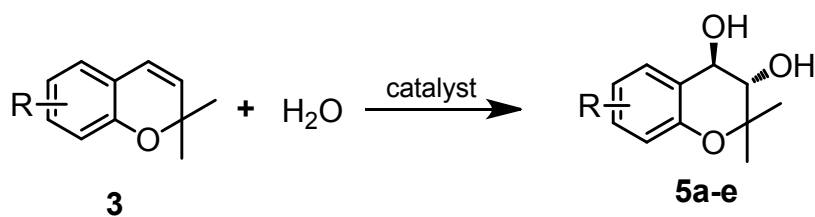

| Entry | Catalyst                                                               | system        | R     | Conversion(%) | ee(%) |
|-------|------------------------------------------------------------------------|---------------|-------|---------------|-------|
| 1     | (R)-Me <sub>2</sub> LMnCl and (R) Me <sub>2</sub> LCoOAc <sup>S4</sup> | Homogeneous   | 6-H   | 83            | 94    |
| 2     |                                                                        |               | 6-OMe | 80            | 94    |
| 3     | Salen <sup>CuMnCo</sup> -MTV-MOF <sup>S4</sup>                         | Heterogeneous | 6-H   | 82            | 97    |
| 4     |                                                                        |               | 6-F   | 83            | 93    |
| 5     |                                                                        |               | 6-OMe | 86            | 98    |

**15.4 Table S7.** Condition optimization of epoxidation catalyzed by **1**

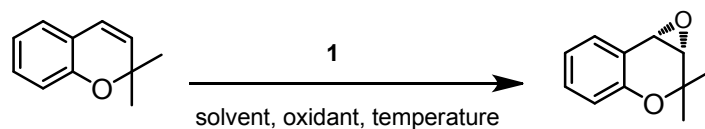

| entry | solvent            | Temperature(°C) | oxidant | Conv(%) | ee(%) |
|-------|--------------------|-----------------|---------|---------|-------|
| 1     | CHCl <sub>3</sub>  | 0               | MesIO   | 91      | 84    |
| 2     | CHCl <sub>3</sub>  | 0               | PhIO    | 93      | 87    |
| 3     | CHCl <sub>3</sub>  | 0               | sPhIO   | 81      | 62    |
| 4     | toluene            | 0               | PhIO    | 56      | 82    |
| 5     | THF                | 0               | PhIO    | 16      | 64    |
| 6     | CH <sub>3</sub> CN | 0               | PhIO    | 69      | 64    |
| 7     | CHCl <sub>3</sub>  | -7              | PhIO    | 94      | 87    |
| 8     | CHCl <sub>3</sub>  | -15             | PhIO    | 93      | 91    |
| 9     | CHCl <sub>3</sub>  | -20             | PhIO    | 93      | 91    |
| 10    | CHCl <sub>3</sub>  | -30             | PhIO    | 81      | 90    |

**15.5 Table S8.** Comparison of asymmetric epoxidation/aminolysis reaction catalyzed by **1a** and **1**

| entry | R    | Ar | 4/Conversion(%) |              | ee(%)         |              |
|-------|------|----|-----------------|--------------|---------------|--------------|
|       |      |    | MOF <b>1a</b>   | MOF <b>1</b> | MOF <b>1a</b> | MOF <b>1</b> |
| 1     | H    | Ph | <b>a</b> /93    | <b>a</b> /21 | 94            | 91           |
| 2     | 6-Br | Ph | <b>d</b> /87    | <b>d</b> /17 | 93            | 91           |

|   |   |                                            |              |              |    |    |
|---|---|--------------------------------------------|--------------|--------------|----|----|
| 3 | H | <i>p</i> -MeOC <sub>6</sub> H <sub>4</sub> | <b>g</b> /76 | <b>g</b> /18 | 93 | 90 |
|---|---|--------------------------------------------|--------------|--------------|----|----|

**15.6 Table S9.** Condition optimization of epoxidation catalyzed by **2**

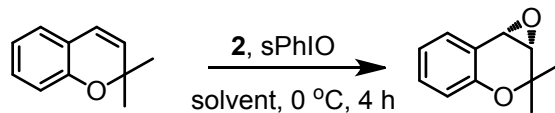

| Entry | solvent                              | Conversion(%) | ee(%) |
|-------|--------------------------------------|---------------|-------|
| 1     | CHCl <sub>3</sub>                    | 82            | 79    |
| 2     | CH <sub>2</sub> ClCH <sub>2</sub> Cl | 75            | 80    |
| 3     | CH <sub>2</sub> Cl <sub>2</sub>      | 87            | 87    |
| 4     | 1,2-dimethoxyethane                  | 64            | 75    |
| 5     | acetone                              | 74            | 83    |
| 6     | CH <sub>3</sub> CN                   | 52            | 7     |
| 7     | THF                                  | 58            | 75    |

**15.7 Table S10.** Condition optimization of hydrolysis catalyzed by **2**

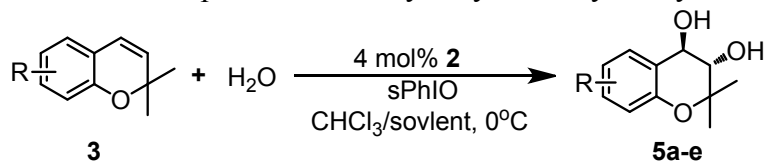

| Entry | solvent                              | Conversion(%) | ee   |
|-------|--------------------------------------|---------------|------|
| 1     | 1,4-dioxane                          | 67            | 78   |
| 2     | Et <sub>2</sub> O                    | 64            | 77   |
| 3     | CH <sub>2</sub> Cl <sub>2</sub>      | 75            | 78   |
| 4     | CH <sub>3</sub> Cl                   | 63            | 79   |
| 5     | CH <sub>2</sub> ClCH <sub>2</sub> Cl | 64            | 75   |
| 6     | CH <sub>3</sub> CN                   | 63            | 74   |
| 7     | MTBE                                 | 87            | 80   |
| 8     | anisole                              | trace         | N.D. |

**15.8 Table S11.** Sequential asymmetric epoxidation/ring-opening reactions of alkenes catalyzed by **2**.<sup>a</sup>

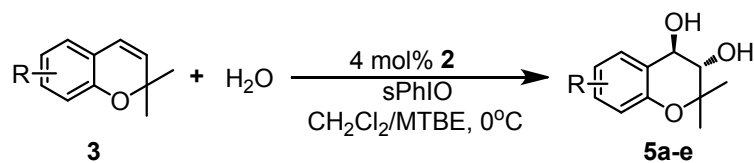

| Entry | R     | <b>5</b> /Conv. (%) <sup>b</sup> | ee (%) <sup>c</sup> |
|-------|-------|----------------------------------|---------------------|
| 1     | H     | <b>a</b> /79(81)                 | 81(79)              |
| 2     | 6-OMe | <b>b</b> /74                     | 86                  |

|   |                   |          |        |
|---|-------------------|----------|--------|
| 3 | 6-F               | c/61(64) | 89(88) |
| 4 | 6-NO <sub>2</sub> | d/61     | 90     |
| 5 | 6-COOMe           | e/63     | 87     |

<sup>a</sup>For reaction details see Experimental section; the data in parentheses are results catalyzed by 1:1 mixture of MnL<sup>I</sup>Cl and V<sup>IV</sup>O(Me<sub>2</sub>L<sup>2</sup>). <sup>b</sup>conversions were calculated by <sup>1</sup>H NMR. <sup>c</sup>ee values were determined by HPLC.

## 16. References

- [S1] G. M. Sheldrick, SHELXT-2014, 2013.
- [S2] O. V. Dolomanov, L. J. Bourhis, R. J. Gildea, J. A. K. Howard, H. Puschmann, OLEX2: a complete structure solution, refinement and analysis program. *J. Appl. Crystallogr.* 2009, **42**, 339-341.
- [S3] Spek, A. L. *J. Appl. Crystallogr.* 2003, **36**, 7.
- [S4] Xia, Q., Li, Z., Tan, C., Liu, Y., Gong, W., Cui, Y. *J. Am. Chem. Soc.* 2017, **139**, 8259-8266.
- [S5] Jacobsen, E. N., Zhang, W., Muci, A. R., Ecker, J. R., Deng, L. *J. Am. Chem. Soc.*, 1991, **113**, 7063.
- [S6] H. Shitama and T. Katsuki, *Tetrahedron Lett.*, 2006, **47**, 3203-3207.
- [S7] F. Song, C. Wang, J. M. Falkowski, L. Ma and W. Lin, *J. Am. Chem. Soc.*, 2010, **132**, 15390-15398.
- [S8] S.-H. Cho, B. Ma, S. T. Nguyen, J. T. Hupp and T. E. Albrecht-Schmitt, *Chem. Commun.*, 2006, 2563.
- [S9] Song, C. E.; Roh, E. J.; Yu, B. M.; Chi, D. Y.; Kim, S. C.; Lee, K.-J. *Chem. Commun.*, 2000, 615.
- [S10] X. Han, Q. Xia, J. Huang, Y. Liu, C. Tan and Y. Cui, *J. Am. Chem. Soc.*, 2017, **139**, 8693-8697.
